# Supplementary material for: German Language Adaptation of the NAVS (NAVS-G) and of the NAT (NAT-G): Testing Grammar in Aphasia
Source: PubMed Central journal article supplement (PMC8069474; doi:10.3390/brainsci11040474), 2021-04-08
Supplement: brainsci-11-00474-s001.pdf [file brainsci-11-00474-s001.pdf]

**Supplementary Materials and Results:** The following are available online at [www.mdpi.com/xxx/s1](http://www.mdpi.com/xxx/s1)

Contents:

### **Supplementary Materials**

- Supplementary Table 1: Summary of tests for aphasia in German language
- Supplementary Table 2: The healthy participants
- Supplementary Table 3: The aphasic participants
- Supplementary Table 4: List of changed target verbs in NAVS-G /NAT-G compared to original NAVS-G
- Supplementary Table 5: List of log. frequency of each target verb used in NAVS-G /NAT-G
- Supplementary Table 6: List of novel sentences in NAVS-G /NAT-G
- Supplementary Figure 1: NAVS-G errors in patients with aphasia

### **Supplementary results: Within group analysis**

- Supplementary Table 7: All participants' results in the different subtests
- Supplementary Table 8: Complete NAVS-G VNT results
- Supplementary Table 9: Complete NAVS-G ASPT results
- Supplementary Table 10: Complete NAVS-G SPPT results
- Supplementary Table 11: Complete NAVS-G SCT results
- Supplementary Table 12: Complete NAT-G results

Supplementary Materials

**Supplementary Table1 1: Overview of aphasia tests in the German language**

| German Tests for Aphasia                  | Comprehension |        | Production |        |                 | Reading |
|-------------------------------------------|---------------|--------|------------|--------|-----------------|---------|
|                                           | Sentences     | Syntax | Repetition | Naming | Sentence syntax |         |
| Aachener Aphasie Test                     | x             |        | x          | x      | x               | (x)     |
| Aachener Aphasie Bedside-Test             | x             |        |            | x      | x               |         |
| Aphasie-Check-Liste                       | x             |        | x          | x      |                 | x       |
| Amsterdam-Nijmegen Everyday Language Test |               |        |            |        |                 |         |
| Aphasie-Schnell-Test                      | x             |        |            |        |                 | x       |
| Bielefelder Aphasie Screening             | x             |        | x          | x      | x               | x       |
| Kurze Aphasieprüfung                      | x             |        | x          | x      |                 | x       |
| Komplexe Sätze                            |               |        |            |        | x               | x       |
| Sätze verstehen                           | x             | x      |            |        |                 |         |
| Lexikon modellorientiert 2.0              | x             |        | x          | x      |                 | x       |
| Sprachsystematisches Aphasiescreening     | x             | x      | x          | x      | x               | x       |
| Token-Test                                | x             |        |            |        |                 | (x)     |
| NAVS                                      | x             | x      |            | x      | x               | x       |
| NAT                                       |               |        |            |        | x*              | (x)     |

Supplementary Table 1 gives an overview of frequently used German language tests. It compares three aspects of speech: “comprehension” (subdivided in “sentence comprehension” and “syntax”), “production” (subdivided in “repeating”, “naming”, “sentence production”, and “syntax”), and “reading”.

The Bielefelder Aphasie Screening (Richter et al. 2006) is another diagnostic test for German stroke patients, allowing aphasia's diagnosis, aphasia's severity, and the syndrome classification. Basic syntactic skills are examined in several subtests (the analysis of spontaneous speech, sentence comprehension, and sentence production for picture description). However, a depth-diagnostics concerning syntax, e.g., the production of complex sentences, is missed. In contrast to the above-mentioned traditional aphasia test batteries, the "Lexikon modellorientiert 20" (LeMO) is based on the language faculty's cognitive neuropsychological models (Morton 1979 and 1970) to aphasia assessment and to plan individual treatment. This model lacks the syntax system. Therefore, the LEMO could not identify syntactic deficits.

## Characteristics of Healthy and aphasic participants

Supplementary Table 2: The healthy participants

| Characteristics of Participants |        |              |                           |                            |
|---------------------------------|--------|--------------|---------------------------|----------------------------|
| Subject                         | Gender | Age in years | Educational qualification | Highest educational degree |
| 1                               | f      | 60           | 3                         | 3                          |
| 2                               | m      | 60           | 3                         | 2                          |
| 3                               | f      | 64           | 3                         | 2                          |
| 4                               | f      | 49           | 3                         | 2                          |
| 5                               | m      | 57           | 4                         | 3                          |
| 6                               | m      | 48           | 4                         | 3                          |
| 7                               | f      | 57           | 4                         | 2                          |
| 8                               | f      | 62           | 4                         | 3                          |
| 9                               | m      | 66           | 4                         | 3                          |
| 10                              | f      | 28           | 4                         | 3                          |
| 11                              | m      | 30           | 4                         | 3                          |
| 12                              | m      | 25           | 4                         | 3                          |
| 13                              | f      | 25           | 4                         | 3                          |
| 14                              | f      | 29           | 4                         | 3                          |
| 15                              | m      | 34           | 4                         | 3                          |
| 16                              | m      | 34           | 4                         | 3                          |
| 17                              | m      | 52           | 2                         | 2                          |
| 18                              | f      | 79           | 2                         | 1                          |
| 19                              | f      | 68           | 3                         | 1                          |
| 20                              | m      | 78           | 3                         | 2                          |
| 21                              | f      | 72           | 3                         | 2                          |
| 22                              | m      | 77           | 2                         | 2                          |
| 23                              | m      | 75           | 2                         | 2                          |
| 24                              | m      | 52           | 4                         | 3                          |
| 25                              | f      | 84           | 1                         | 1                          |
| 6                               | f      | 88           | 1                         | 1                          |
| 27                              | m      | 56           | 2                         | 1                          |

Supplementary Table 2 reports: gender - f= female. m= male - education (Ed.) qualification - 1 = No school leaving certificate. 2 = junior high school certificate covering eight years ("Hauptschulabschluss"). 3 = secondary high school leaving certificate covering ten years ("Realschulabschluss"). 4 = Abitur -, and highest educational qualification - 1= no education degree. 2= completed apprenticeship degree. 3 = university degree.

| Pat. | infarct size | Aphasia (T0) |        |       | Aphasia (T1) |        |       |      |      |       |      |       | MoCA(T1) |      |     |     |     |     |     | NAVS-G /NAT-G |     |    |
|------|--------------|--------------|--------|-------|--------------|--------|-------|------|------|-------|------|-------|----------|------|-----|-----|-----|-----|-----|---------------|-----|----|
|      |              | Severity     | Type   | GS    | severity     | Type   | GS    | SS   | TT   | R     | W    | N     | C        | GS   | Ex  | N   | At  | L   | Ab  | M             | O   | GS |
|      | ml           |              |        | 0-530 |              |        | 0-530 | 0-30 | 0-50 | 0-150 | 0-90 | 0-120 | 0-120    | 0-30 | 0-5 | 0-3 | 0-6 | 0-3 | 0-2 | 0-5           | 0-6 | %  |
| 1    | 47.24        | middle       | Global | 213   | mild         | Broca  | 457   | 25   | 44   | 135   | 75   | 105   | 98       |      |     |     |     |     |     |               |     | 76 |
| 2    | 79.59        | middle       | Broca  | 237   | mild         | Anomic | 471   | 25   | 48   | 136   | 77   | 103   | 94       | 18   | 2   | 3   | 4   | 1   | 1   | 2             | 5   | 90 |
| 3    | 38.64        | severe       | Global | 182   | mild         | Anomic | 446   | 26   | 40   | 139   | 83   | 83    | 101      |      |     |     |     |     |     |               |     | 98 |
| 4    | 7.26         | mild         | Anomic | 447   | minimal      | RA     | #     | 28   | 50   | ^     | 89   | ^     | ^        | 24   | 4   | 3   | 6   | 2   | 1   | 2             | 6   | 95 |
| 5    | 1.81         | mild         | Broca  | 460   | minimal      | RA     | #     | 29   | 50   | ^     | 89   | ^     | ^        | 26   | 5   | 3   | 6   | 2   | 2   | 2             | 6   | 98 |
| 6    | 24.96        | minimal      | RA     | 512   | minimal      | RA     | #     | 29   | 50   | ^     |      | ^     | ^        | 25   | 4   | 2   | 6   | 1   | 2   | 4             | 6   | 98 |
| 7    | 35           | mild         | Anomic | 416   | minimal      | RA     | #     | 29   |      | ^     |      | ^     | ^        | 27   | 4   | 3   | 6   | 2   | 1   | 4             | 6   | 97 |
| 8    | 106.99       | severe       | Global | 64    | minimal      | RA     | 516   | 27   | 45   | 148   | 89   | 120   | 114      |      |     |     |     |     |     |               |     | 98 |
| 9    | 18.48        | very severe  | Global | #     | minimal      | RA     | 490   | 21   | 49   | 130   | 83   | 114   | 114      |      |     |     |     |     |     |               |     | 95 |
| 10   | 3.23         | very severe  | Global | #     | mild         | Broca  | 394   | 19   | 27   | 124   | 51   | 81    | 70       | #    |     |     |     |     |     |               |     | 81 |
| 11   | 16.18        | very severe  | Global | #     | middle       | Broca  | 378   | 16   | 47   | 94    | 51   | 82    | 59       | #    |     |     |     |     |     |               |     | 67 |
| 12   | ^            | mild         | Anomic | #     | minimal      | RA     | #     | 28   | 46   | ^     | 90   | ^     | ^        | 25   | 5   | 1   | 6   | 2   | 2   | 3             | 6   | 82 |
| 13   | *            | severe       | Broca  | #     | mild         | Broca  | *     | 21   | *    | *     | *    | *     | *        | *    | *   | *   | *   | *   | *   | *             | *   | 92 |
| 14   | *            | mild         | Anomic | *     | minimal      | RA     | *     | 29   | *    | *     | *    | *     | *        | *    | *   | *   | *   | *   | *   | *             | *   | 98 |
| 15   | 34.5         | mild         | Anomic | 476   | minimal      | RA     | 513   | 29   | 45   | 150   | 90   | 119   | 109      | 28   | 5   | 3   | 6   | 3   | 2   | 3             | 6   | 76 |

## Supplementary Table2: The aphasic participants

Supplementary Table 3 reports the AAT results of the patients with aphasia at stroke time and NAVS-G and NAT-G testing (chronic time). Patients' row data of the AAT's six description levels for spontaneous speech (including communicative verbal behavior (1), articulation and prosody (2), automatized language (3), semantic structure (4), phonemic structure (5), and syntactic structure (6)), and the row data of the five AAT's subtests (token test (TT), repetition (R), written language (WR), naming (N), and sentence comprehension (C)) are reported for the chronic time. A total of 530 points can be achieved in the AAT. Patients N. 13 and 14 had a clinical diagnosis of aphasia based on AAT spontaneous speech analysis only, as AAT's testing was not available. Patient n. 6 refused further testing.

MoCA test could be performed only in patients who participated in Large scale protocol and when the clinic profile was light. The character # displays patients who could perform neither the AAT at the acute phase nor the MoCA in the chronic phase. The MOCA includes seven subtests for testing executive function (Ex), naming (N), attention (A), language (L), abstraction (Ab), verbal memory (M), and orientation (Or). In bracket are noticed the maximal scores for each subtest.

The table also reports the NAVS/NAT-G global scores (GS) for each patient.

Abbreviation: RA = residual aphasia

## List of novel verbs in NAVS-G /NAT-G

**Supplementary Table 3: List of changed target verbs in NAVS-G /NAT-G compared to original NAVS-G**

| Verb in NAVS<br>(original<br>version) | German<br>translation | alternative Verb in NAVS-G<br>/NAT-G     | Reason for change               |
|---------------------------------------|-----------------------|------------------------------------------|---------------------------------|
| cut (ob2)                             | schneiden (ob2)       | küssen (ob2)<br>transl.: <i>kiss</i>     | NAT verb                        |
| read (op3)                            | vorlesen (op3)        | schreiben (op3)<br>transl.: <i>write</i> | exclusion of compound<br>verbs  |
| watch (op2)                           | beobachten (ob2)      | essen (op2)<br>transl.: <i>eat</i>       | different argument<br>structure |
| stir (ob2)                            | rühren (op2)          | retten (ob2)<br>transl.: <i>save</i>     | different argument<br>structure |
| pinch (ob2)                           | kneifen (ob2)         | jagen (ob2)<br>transl.: <i>chase</i>     | NAT verb                        |
| pour (op3)                            | einschenken (op3)     | zeigen (op3)<br>transl.: <i>show</i>     | exclusion of compound<br>verbs  |
| tickle (ob2)                          | kitzeln (ob2)         | ziehen (ob2)<br>transl.: <i>pull</i>     | NAT verb                        |
| shave (op2)                           | rasieren (ob2)        | fegen (op2)<br>transl.: <i>sweep</i>     | different argument<br>structure |

We substituted: 1) 'to watch' (beobachten) and 'to shave' (rasieren), as they are op2 in English but ob2 in German. To stir' (rühren) is ob2 in English but op2 in German; 2) 'to pour' (einschenken) and 'to read' (vorlesen), as their translation to German is a compound verb; 3) 'to cut', 'to pinch' and 'to tickle' were replaced by 'to kiss' - küssen-, 'to chase' - jagen- and 'to pull' - ziehen- other ob2-verbs used in the sentences in the original NAT.

## Frequency of verbs used in NAVS-G and NAT-G.

**Supplementary Table 4: List of log. frequency of each target verb used in NAVS-G /NAT-G**

| Verb             | Argument structure | log. frequency |
|------------------|--------------------|----------------|
| bellen (bark)    | ob1                | .4771          |
| heulen (howl)    | ob1                | .8451          |
| krabbeln (crawl) | ob1                | 0              |
| lachen (laugh)   | ob1                | 20374          |

|                       |     |               |
|-----------------------|-----|---------------|
| schwimmen (swim)      | ob1 | 1.415         |
| <b>ob1 mean</b>       |     | <b>.9549</b>  |
| jagen (chase)         | ob2 | 1.4472        |
| küssen (kiss)         | ob2 | 1.4914        |
| retten (save)         | ob2 | 1.8573        |
| schubsen (shove)      | ob2 | 0             |
| ziehen (pull)         | ob2 | 2.4533        |
| <b>ob2 mean</b>       |     | <b>1.4498</b> |
| fahren (drive)        | op2 | 2.6857        |
| waschen (wash)        | op2 | 1.301         |
| beißen (bite)         | op2 | 1.3222        |
| essen (eat)           | op2 | 1.8261        |
| fegen (sweep)         | op2 | .7782         |
| <b>op2 mean</b>       |     | <b>1.5827</b> |
| stellen (put)         | ob3 | 2.8457        |
| geben (give)          | ob3 | 3.2378        |
| <b>ob3 mean</b>       |     | <b>3.0418</b> |
| schicken (send)       | op3 | 1.7634        |
| schreiben (write)     | op3 | 2.4857        |
| überreichen (deliver) | op3 | 1.5051        |
| werfen (throw)        | op3 | 2.1818        |
| zeigen (show)         | op3 | 2.7226        |
| <b>op3 mean</b>       |     | <b>2.1317</b> |

#### List of novel sentences in NAVS-G /NAT-G

Supplementary Table 5: List of novel sentences in NAVS-G /NAT-G

| Test | German Verb<br>(English translation) | novel sentence in ASPT                    |
|------|--------------------------------------|-------------------------------------------|
| ASPT | küssen (kiss)                        | Der Mann küsst die Frau.                  |
|      | schreiben (write)                    | Der Mann schreibt (der Frau) einen Brief. |

|              |                  |                                           |
|--------------|------------------|-------------------------------------------|
|              | essen (eat)      | Der Mann isst (ein Brötchen).             |
|              | retten (save)    | Der Mann rettet die Frau.                 |
|              | jagen (chase)    | Der Hund jagt die Katze.                  |
|              | ziehen (pull)    | Der Junge zieht das Mädchen.              |
|              | fegen (sweep)    | Der Mann fegt (den Boden).                |
| NAT/SPPT/SVT | schubsen (shove) | z.B. Aktiv: Der Junge schubst das Mädchen |

### MRI data acquisition and lesion analysis

For the diffusion-weighted imaging, we used a standard sequence (23 slices, matrix = 128 x 128 pixel, voxel size = 1.8 x 1.8 x 5 mm, repetition time = 3.1 s, echo time = 79 ms, flip angle = 9, six diffusion-encoding gradient directions with a b-factor of 1000 s/mm<sup>2</sup>). All patients received FLAIR images (repetition time = 9000 ms, echo time = 93.0 ms, flip angle = 14, matrix 200 x 256 pixel, voxel size = 0.94 x 0.94 x 5.00 mm, 23 slices). As a prerequisite for spatial normalization, a high-resolution T1 anatomical scan was obtained from 91 patients (repetition time = 2200 ms, echo time = 2.15 ms, flip angle = 12, matrix = 256 x 256 pixel, voxel size = 1 x 1 x 1 mm, 176 slices).

For lesion analysis, a rough delineation of the diffusion-weighted imaged lesion was performed using a customized region-of-interest toolbox implemented in SPM8 (<http://www.fil.ion.ucl.ac.uk/spm/software/spm8>). Individual intensity thresholds were applied to find the best match between the binary lesion map and the diffusion-restricted brain tissue. Subsequently, the lesions maps were inspected in MRICron (<http://www.cabiatl.com/mrico/mricon/stats.html>) and manually adjusted if necessary. In one case, no diffusion-weighted image was available and the lesion was drawn directly onto a FLAIR image. For spatial normalization of the lesion maps, the underlying diffusion-weighted imaging scan (or FLAIR image) was co-registered to the anatomical T1 scan (n = 91). High-resolution T1 scans were segmented using the VBM8 toolbox (r435; <http://dbm.neuro.uni-jena.de/vbm/download/>). Deformation field parameters for nonlinear normalization into the stereotactic Montreal Neurological Institute (MNI) standard space were then computed using the DARTEL (diffeomorphic anatomical registration through exponentiated lie algebra; [177]) approach implemented in VBM8. Normalization quality of lesion maps was visually checked by M.H. In five cases in which no T1 scan of sufficient quality was available, parameters for normalization were obtained using FLAIR images. As smaller diffusion restricted areas may be indiscernible in chronic MRI scans or CT scans, our approach of mapping lesions on acute diffusion-weighted images may contribute significantly to a more precise determination of lesion.





Patients with aphasia produced several kinds of mistakes when performing the NAVS-G and NAT-G tests. According to the literature, differentiating between representational deficits, deficits in syntactic operation, and semantic errors is, however, possible.

Supplementary results: Descriptive statistics

**Supplementary Table 6: Participants' results in the different NAVS-G and NAT-G subtests**

| N.      |       |       |              |              | NAT     |         |        |       | SPPT      |          |         |           | SVT      |          | total score |
|---------|-------|-------|--------------|--------------|---------|---------|--------|-------|-----------|----------|---------|-----------|----------|----------|-------------|
|         | VNT   | VCT   | ASPT         | NAT          | NAT can | non-can | NAT OR | SPTT  | SPPT can. | non-can. | SPPT OR | SVT total | SVT can. | non-can. |             |
| LHSP1   | 81.8% | 100%  | <b>84.7%</b> | <b>53.3%</b> | 60%     | 46.7%   | 40%    | 3.0%  | 46.7%     | 13.3%    | .0%     | 80%       | 100%     | 60%      | 76.3%       |
| LHSP 2  | 95.5% | 100%  | 100%         | <b>83.3%</b> | 100%    | 66.7%   | 20%    | 40%   | 46.7%     | 33.3%    | 20%     | 83.3%     | 86.7%    | 80%      | 90%         |
| LHSP 3  | 100%  | 100%  | 100%         | <b>96.7%</b> | 100%    | 93.3%   | 100%   | 86.7% | 93.3%     | 80%      | 40%     | 100%      | 100%     | 100%     | 98.3%       |
| LHSP 4  | 86.4% | 100%  | <b>96.8%</b> | 100%         | 100%    | 100%    | 100%   | 86.7% | 93.3%     | 80%      | 40%     | 90%       | 100%     | 80%      | 94.8%       |
| LHSP 5  | 95.5% | 100%  | 100%         | 100%         | 100%    | 100%    | 100%   | 90%   | 93.3%     | 86.7%    | 60%     | 96.7%     | 100%     | 93.3%    | 98.3%       |
| LHSP 6  | 100%  | 100%  | 100%         | 100%         | 100%    | 100%    | 100%   | 80%   | 86.7%     | 73.3%    | 20%     | 100%      | 100%     | 100%     | 97.9%       |
| LHSP 7  | 86.4% | 100%  | 100%         | 90%          | 93.3%   | 86.7%   | 60%    | 90%   | 93.3%     | 86.7%    | 60%     | 96.7%     | 100%     | 93.3%    | 96.6%       |
| LHSP 8  | 100%  | 100%  | <b>99.4%</b> | 96.7%        | 100%    | 93.3%   | 80%    | 86.7% | 93.3%     | 80%      | 40%     | 100%      | 100%     | 100%     | 97.9%       |
| LHSP 9  | 99%   | 100%  | 100%         | 96.7%        | 100%    | 93.3%   | 80%    | 66.7% | 100%      | 33.3%    | .0%     | 96.7%     | 100%     | 93.3%    | 95.2%       |
| LHSP 10 | 86.4% | 100%  | 100%         | 20%          | 33.3%   | 6.7%    | .0%    | 23.3% | 40%       | 67%      | .0%     | 80%       | 93.3%    | 66.7%    | 8.8%        |
| LHSP 11 | 72.7% | 95.5% | <b>71%</b>   | 46.7%        | 66.7%   | 26.7%   | .0%    | 36.7% | 53.3%     | 20%      | .0%     | 76.7%     | 93.3%    | 60%      | 67.0%       |
| LHSP 12 | 86.4% | 100%  | <b>96.2%</b> | 33.3%        | 60%     | 6.7%    | .0%    | 40%   | 80%       | .0%      | .0%     | 83.3%     | 86.7%    | 80%      | 82.1%       |
| LHSP 13 | 99%   | 100%  | 100%         |              |         |         |        | 53.3% | 60%       | 46.7%    | .0%     | 83.3%     | 66.7%    | 100%     | 82.5%       |
| LHSP 14 | 99%   | 100%  | 100%         |              |         |         |        | 90%   | 93.3%     | 86.7%    | 60%     | 96.7%     | 100%     | 93.3%    | 87.6%       |
| LHSP 15 | 77.3% | 100%  | 100%         | 100%         | 100%    | 100%    | 100%   | 80%   | 100%      | 60%      | 40%     | 100%      | 100%     | 100%     | 76.3%       |
| HP1     | 100%  | 100%  | 1000%        | 100%         | 100%    | 100%    | 100%   | 100%  | 100%      | 100%     | 100%    | 100%      | 100%     | 100%     | 100%        |
| HP2     | 100%  | 100%  | 1000%        | 100%         | 100%    | 100%    | 100%   | 96.7% | 100%      | 93.3%    | 80%     | 100%      | 100%     | 100%     | 99.7%       |
| HP3     | 100%  | 100%  | 1000%        | 100%         | 100%    | 100%    | 100%   | 100%  | 100%      | 100%     | 100%    | 100%      | 100%     | 100%     | 100%        |
| HP4     | 100%  | 100%  | 1000%        | 100%         | 100%    | 100%    | 100%   | 100%  | 100%      | 100%     | 100%    | 100%      | 100%     | 100%     | 100%        |
| HP5     | 100%  | 100%  | 1000%        | 100%         | 100%    | 100%    | 100%   | 96.7% | 100%      | 93.3%    | 80%     | 100%      | 100%     | 100%     | 99.7%       |

|        |       |       |       |       |       |       |      |       |       |       |      |       |       |       |       |
|--------|-------|-------|-------|-------|-------|-------|------|-------|-------|-------|------|-------|-------|-------|-------|
| HP6    | 100%  | 100%  | 1000% | 100%  | 100%  | 100%  | 100% | 100%  | 100%  | 100%  | 100% | 100%  | 100%  | 100%  | 100%  |
| HP7    | 100%  | 100%  | 1000% | 100%  | 100%  | 100%  | 100% | 100%  | 100%  | 100%  | 100% | 100%  | 100%  | 100%  | 100%  |
| HP8    | 100%  | 100%  | 1000% | 100%  | 100%  | 100%  | 100% | 100%  | 100%  | 100%  | 100% | 100%  | 100%  | 100%  | 100%  |
| HP9    | 100%  | 100%  | 1000% | 100%  | 100%  | 100%  | 100% | 96.7% | 100%  | 93.3% | 100% | 100%  | 100%  | 100%  | 99.7% |
| HP10   | 100%  | 100%  | 1000% | 100%  | 100%  | 100%  | 100% | 100%  | 100%  | 100%  | 100% | 100%  | 100%  | 100%  | 100%  |
| HP11   | 100%  | 100%  | 1000% | 100%  | 100%  | 100%  | 100% | 100%  | 100%  | 100%  | 100% | 100%  | 100%  | 100%  | 100%  |
| HP12   | 100%  | 100%  | 1000% | 100%  | 100%  | 100%  | 100% | 100%  | 100%  | 100%  | 100% | 100%  | 100%  | 100%  | 100%  |
| HP13   | 100%  | 100%  | 1000% | 100%  | 100%  | 100%  | 100% | 100%  | 100%  | 100%  | 100% | 100%  | 100%  | 100%  | 100%  |
| HP14   | 100%  | 100%  | 1000% | 100%  | 100%  | 100%  | 100% | 100%  | 100%  | 100%  | 100% | 100%  | 100%  | 100%  | 100%  |
| HP15   | 100%  | 100%  | 1000% | 100%  | 100%  | 100%  | 100% | 100%  | 100%  | 100%  | 100% | 100%  | 100%  | 100%  | 100%  |
| HP16   | 100%  | 100%  | 1000% | 100%  | 100%  | 100%  | 100% | 100%  | 100%  | 100%  | 100% | 100%  | 100%  | 100%  | 100%  |
| HP17   | 100%  | 100%  | 1000% | 100%  | 100%  | 100%  | 100% | 76.7% | 93.3% | 60%   | .0%  | 100%  | 100%  | 100%  | 97.6% |
| HP18   | 95.5% | 100%  | 1000% | 100%  | 100%  | 100%  | 100% | 93.3% | 93.3% | 93.3% | 80%  | 100%  | 100%  | 100%  | 990%  |
| HP19   | 100%  | 100%  | 1000% | 100%  | 100%  | 100%  | 100% | 96.7% | 100%  | 93.3% | 80%  | 100%  | 100%  | 100%  | 99.7% |
| HP20   | 100%  | 95.5% | 1000% | 100%  | 100%  | 100%  | 100% | 93.3% | 100%  | 86.7% | 60%  | 100%  | 100%  | 100%  | 990%  |
| HP21   | 100%  | 100%  | 1000% | 100%  | 100%  | 100%  | 100% | 100%  | 100%  | 100%  | 100% | 100%  | 100%  | 100%  | 100%  |
| HP22   | 95.5% | 100%  | 1000% | 100%  | 100%  | 100%  | 100% | 86.7% | 86.7% | 86.7% | 60%  | 86.7% | 100%  | 73.3% | 96.9% |
| HP23   | 100%  | 100%  | 1000% | 100%  | 100%  | 100%  | 100% | 86.7% | 100%  | 73.3% | 20%  | 96.7% | 93.3% | 100%  | 98.3% |
| HP24   | 100%  | 100%  | 1000% | 100%  | 100%  | 100%  | 100% | 100%  | 100%  | 100%  | 100% | 100%  | 100%  | 100%  | 100%  |
| HP25   | 100%  | 100%  | 1000% | 100%  | 100%  | 100%  | 100% | 83.3% | 100%  | 66.7% | .0%  | 100%  | 100%  | 100%  | 98.3% |
| HP26   | 100%  | 100%  | 1000% | 100%  | 100%  | 100%  | 100% | 76.7% | 93.3% | 60%   | 20%  | 100%  | 100%  | 100%  | 97.6% |
| HP27   | 100%  | 100%  | 1000% | 100%  | 100%  | 100%  | 100% | 100%  | 100%  | 100%  | 100% | 100%  | 100%  | 100%  | 100%  |
| RHSP1  | 100%  | 100%  | 100%  | 100%  | 100%  | 100%  | 100% | 100%  | 100%  | 100%  | 100% | 100%  | 100%  | 100%  | 100%  |
| RHSP2  | 100%  | 100%  | 100%  | 100%  | 100%  | 100%  | 100% | 80%   | 86.7% | 73.3% | 40%  | 100%  | 100%  | 100%  | 97.9% |
| RHSP3  | 100%  | 100%  | 100%  | 93.3% | 100%  | 86.7% | 60%  | 80%   | 93.3% | 66.7% | 40%  | 100%  | 100%  | 100%  | 97.3% |
| RHSP4  | 100%  | 100%  | 100%  | 100%  | 100%  | 100%  | 100% | 90%   | 93.3% | 86.7% | 80%  | 100%  | 100%  | 100%  | 990%  |
| RHSP5  | 100%  | 100%  | 100%  | 100%  | 100%  | 100%  | 100% | 96.7% | 100%  | 93.3% | 80%  | 100%  | 100%  | 100%  | 99.7% |
| RHSP6  | 100%  | 100%  | 100%  | 100%  | 100%  | 100%  | 100% | 93.3% | 100%  | 86.7% | 80%  | 100%  | 100%  | 100%  | 99.3% |
| RHSP7  | 100%  | 100%  | 100%  | 86.7% | 93.3% | 80%   | 40%  | 86.7% | 86.7% | 86.7% | 60%  | 90%   | 93.3% | 86.7% | 96.2% |
| RHSP8  | 100%  | 100%  | 100%  | 100%  | 100%  | 100%  | 100% | 100%  | 100%  | 100%  | 100% | 100%  | 100%  | 100%  | 100%  |
| RHSP9  | 100%  | 100%  | 100%  | 100%  | 100%  | 100%  | 100% | 100%  | 100%  | 100%  | 100% | 100%  | 100%  | 100%  | 100%  |
| RHSP10 | 100%  | 100%  | 100%  | 100%  | 100%  | 100%  | 100% | 100%  | 100%  | 100%  | 100% | 100%  | 100%  | 100%  | 100%  |
| RHSP11 | 95.5% | 100%  | 100%  | 100%  | 100%  | 100%  | 100% | 86.7% | 100%  | 73.3% | 60%  | 93.3% | 100%  | 86.7% | 97.6% |

|        |      |      |      |       |      |       |      |       |      |       |      |      |      |      |       |
|--------|------|------|------|-------|------|-------|------|-------|------|-------|------|------|------|------|-------|
| RHSP12 | 100% | 100% | 100% | 100%  | 100% | 100%  | 100% | 96.7% | 100% | 93.3% | 80%  | 100% | 100% | 100% | 99.7% |
| RHSP13 | 100% | 100% | 100% | 100%  | 100% | 100%  | 100% | 93.3% | 100% | 86.7% | 80%  | 100% | 100% | 100% | 99.3% |
| RHSP14 | 100% | 100% | 100% | 100%  | 100% | 100%  | 100% | 100%  | 100% | 100%  | 100% | 100% | 100% | 100% | 100%  |
| RHSP15 | 100% | 100% | 100% | 93.3% | 100% | 86.7% | 60%  | 90%   | 100% | 80%   | 60%  | 100% | 100% | 100% | 98.3% |

### Complete results of the logistic regression

Please note that the effect is positive or negative depending on whether the  $z/X^2$  score is positive or negative respectively

**Supplementary Table 8: Complete NAVS-G VNT results**

| <i>A. LHSP</i>                 | <i>Variance</i> | <i>SD</i> | <i>Estimate</i> | <i>SE</i> | <i>p</i> | <i><math>\chi^2</math></i> | <i>z</i> | <i>R<sup>2</sup></i> | <i>Power</i> |
|--------------------------------|-----------------|-----------|-----------------|-----------|----------|----------------------------|----------|----------------------|--------------|
| patients with aphasia          |                 |           |                 |           |          |                            |          |                      |              |
| <i>single predictor models</i> |                 |           |                 |           |          |                            |          |                      |              |
| <b>VAN</b>                     |                 |           |                 |           |          |                            |          | 0,193                |              |
| <i>random effects</i>          |                 |           |                 |           |          |                            |          |                      |              |
| item                           | 1,254           | 1,12      |                 |           | 0,0005   | 12,11                      |          |                      |              |
| participant                    | 0,289           | 0,538     |                 |           | 0,297    | 1,089                      |          |                      |              |
| <i>fixed effects</i>           |                 |           |                 |           |          |                            |          |                      |              |
| VAN                            |                 |           |                 |           | 0,047    | 6,1058                     | 6,106    | 0,1926               | 70%          |
| 2 vs. 1                        |                 |           | -2,8577         | 1,2892    | 0,08     |                            | -2,217   |                      |              |
| 3 vs. 1                        |                 |           | -2,1724         | 1,2661    | 0,129    |                            | -1,716   |                      |              |
| 3 vs. 2                        |                 |           | 0,6853          | 0,724     | 0,344    |                            | 0,947    |                      |              |
| <b>VAO</b>                     |                 |           |                 |           |          |                            |          | 0,054                |              |
| <i>random effects</i>          |                 |           |                 |           |          |                            |          |                      |              |
| item                           | 1,521           | 1,233     |                 |           | 0,000    | 14,426                     |          |                      |              |
| participant                    | 0,293           | 0,541     |                 |           | 0,289    | 1,123                      |          |                      |              |
| <i>fixed effects</i>           |                 |           |                 |           |          |                            |          |                      |              |
| VAO                            |                 |           | 1,0872          | 0,7375    | 0,14     |                            | 1,474    | 0,0545               | 29%          |
| <b>VT</b>                      |                 |           |                 |           |          |                            |          | 0,297                |              |
| <i>random effects</i>          |                 |           |                 |           |          |                            |          |                      |              |
| item                           | 0,290           | 0,538     |                 |           | 0,275    | 1,192                      |          |                      |              |
| participant                    | 0,285           | 0,534     |                 |           | 0,306    | 1,048                      |          |                      |              |
| <i>fixed effects</i>           |                 |           |                 |           |          |                            |          |                      |              |
| VT                             |                 |           |                 |           | 0,002    |                            | 17,46    | 0,2968               | 97%          |

|                       |       |       |         |        |        |        |        |
|-----------------------|-------|-------|---------|--------|--------|--------|--------|
| ob2 vs. ob1           |       |       | -2,822  | 1,1183 | .02786 |        | -2.524 |
| ob3 vs. ob1           |       |       | -3,963  | 1,1933 | .00416 |        | -3.321 |
| op2 vs. ob1           |       |       | -.7153  | 1,2905 | .57856 |        | -.554  |
| op3 vs. ob1           |       |       | -1,8911 | 1,1551 | .14323 |        | -1.637 |
| ob3 vs. ob2           |       |       | -1,1407 | 0,6956 | .14323 |        | -1.640 |
| op2 vs. ob2           |       |       | 2,1069  | 0,866  | .02879 |        | 2.433  |
| op3 vs. ob2           |       |       | 0,9312  | 0,6453 | .1828  |        | 1.443  |
| op2 vs. ob3           |       |       | 3,2477  | 0,9595 | .00416 |        | 3.385  |
| op3 vs. ob3           |       |       | 2,072   | 0,7631 | .02081 |        | 2.715  |
| op3 vs. op2           |       |       | -1,1757 | 0,9134 | .21795 |        | -1.287 |
| <b>AATgs</b>          |       |       |         |        |        |        | .059   |
| <i>random effects</i> |       |       |         |        |        |        |        |
| item                  | 1,094 | 1,046 |         |        | 0,062  | 3,471  |        |
| participant           | 0,069 | 0,263 |         |        | 0,841  | 0,040  |        |
| <i>fixed effects</i>  |       |       |         |        |        |        |        |
| AATgs                 |       |       | 0,004   | 0,002  | 0,036  | 2,101  | 0%     |
| <b>AATsy</b>          |       |       |         |        |        |        | .048   |
| <i>random effects</i> |       |       |         |        |        |        |        |
| item                  | 2,221 | 1,490 |         |        | 0,000  | 21,808 |        |
| participant           | 0,000 | 0,000 |         |        | 0,998  | 0,000  |        |
| <i>fixed effects</i>  |       |       |         |        |        |        |        |
| AATsy                 |       |       | 0,374   | 0,147  | .011   | 2,555  | 64%    |
| <b>frequency</b>      |       |       |         |        |        |        | .157   |
| <i>random effects</i> |       |       |         |        |        |        |        |
| item                  | 0,860 | 0,928 |         |        | 0,016  | 5,752  |        |
| participant           | 0,281 | 0,530 |         |        | 0,304  | 1,058  |        |
| <i>fixed effects</i>  |       |       |         |        |        |        |        |
| frequency             |       |       | -1,043  | 0,376  | 0,006  | -2,774 | 82%    |
| <b>Age</b>            |       |       |         |        |        |        | .062   |
| <i>random effects</i> |       |       |         |        |        |        |        |
| item                  | 1,916 | 1,384 |         |        | 0,000  | 19,820 |        |
| participant           | 0,051 | 0,226 |         |        | 0,824  | 0,050  |        |

*fixed effects*

|           |        |       |      |        |     |
|-----------|--------|-------|------|--------|-----|
| frequency | -0,072 | 0,029 | .013 | -2,478 | 63% |
|-----------|--------|-------|------|--------|-----|

*adjusted models*

|                  |              |  |  |  |  |
|------------------|--------------|--|--|--|--|
| <b>VAN + Age</b> | <b>0,248</b> |  |  |  |  |
|------------------|--------------|--|--|--|--|

*random effects*

|             |       |       |       |        |  |
|-------------|-------|-------|-------|--------|--|
| item        | 1,282 | 1,132 | 0,001 | 12,298 |  |
| participant | 0,046 | 0,214 | 0,842 | 0,040  |  |

*fixed effects*

|         |        |       |       |        |        |     |
|---------|--------|-------|-------|--------|--------|-----|
| VAN     |        |       | 0,047 | 6,131  | 0,2481 | 74% |
| 2 vs. 1 | -2,888 | 1,299 | 0,078 | -2,224 |        |     |
| 3 vs. 1 | -2,196 | 1,275 | 0,128 | -1,722 |        |     |
| 3 vs. 2 | 0,692  | 0,731 | 0,344 | 0,947  |        |     |
| age     | -0,072 | 0,029 | 0,013 | -2,483 |        |     |

|                 |              |  |  |  |  |
|-----------------|--------------|--|--|--|--|
| <b>VT + Age</b> | <b>0,357</b> |  |  |  |  |
|-----------------|--------------|--|--|--|--|

*random effects*

|             |       |       |       |       |  |
|-------------|-------|-------|-------|-------|--|
| item        | 0,292 | 0,540 | 0,279 | 1,170 |  |
| participant | 0,038 | 0,196 | 0,866 | 0,028 |  |

*fixed effects*

|            |         |        |         |        |        |     |
|------------|---------|--------|---------|--------|--------|-----|
| VT         |         |        | 0,001   | 17,579 | 0,3566 | 98% |
| ob2 vs.ob1 | -2,845  | 1,121  | 0,028   | -2,538 |        |     |
| ob3 vs.ob1 | -4,001  | 1,197  | 0,004   | -3,342 |        |     |
| op2 vs.ob1 | -0,7184 | 1,2933 | 0,57856 | -0,555 |        |     |
| op3 vs.ob1 | -1,9032 | 1,158  | 0,14323 | -1,644 |        |     |
| ob3 vs.ob2 | -1,1558 | 0,6998 | 0,14323 | -1,652 |        |     |
| op2 vs.ob2 | 2,127   | 0,869  | 0,029   | 2,447  |        |     |
| op3 vs.ob2 | 0,9421  | 0,6484 | 0,1828  | 1,453  |        |     |
| op2 vs.ob3 | 3,283   | 0,964  | 0,004   | 3,406  |        |     |
| op3 vs.ob3 | 2,098   | 0,767  | 0,021   | 2,735  |        |     |
| op3 vs.op2 | -1,1848 | 0,9166 | 0,21795 | -1,293 |        |     |
| age        | -0,072  | 0,029  | 0,013   | -2,493 |        |     |

|                                          |         |  |  |  |  |
|------------------------------------------|---------|--|--|--|--|
| <b>VT + Age + frequency + AAT syntax</b> | <b></b> |  |  |  |  |
|------------------------------------------|---------|--|--|--|--|



*fixed effects*

|            |          |           |         |        |  |
|------------|----------|-----------|---------|--------|--|
| VT         |          |           | 0,0238  | 11,26  |  |
| ob2 vs.ob1 | -2,4321  | 1,110E+00 | 0,0949  | -2,191 |  |
| ob3 vs.ob1 | -2,6046  | 1,3939    | 0,1028  | -1,869 |  |
| op2 vs.ob1 | -0,2514  | 1,2962    | 0,8474  | -0,194 |  |
| op3 vs.ob1 | -1,1231  | 1,2005    | 0,4369  | -0,936 |  |
| ob3 vs.ob2 | -0,1724  | 0,8961    | 0,8474  | -0,192 |  |
| op2 vs.ob2 | 2,1808   | 0,8444    | 0,0949  | 2,583  |  |
| op3 vs.ob2 | 1,309    | 0,6519    | 0,1028  | 2,008  |  |
| op2 vs.ob3 | 2,3532   | 1,0614    | 0,0949  | 2,217  |  |
| op3 vs.ob3 | 1,4815   | 0,7886    | 0,1028  | 1,879  |  |
| op3 vs.op2 | -0,8717  | 0,8973    | 0,4369  | -0,972 |  |
| frequency  | -0,73591 | 0,43498   | 0,09068 | -1,692 |  |
| age        | -0,08327 | 0,03066   | 0,0066  | -2,716 |  |
| AAT syntax | 0,42061  | 0,15481   | 0,00659 | 2,717  |  |

VAN + frequency + age, + AAT syntax

*fixed effects*

|                |          |         |         |        |        |
|----------------|----------|---------|---------|--------|--------|
| VAN            |          |         | 0,04722 | 1,679  | 0,3488 |
| 2 vs. 1        | -1,56801 | 1,4339  | -1,094  | 0,411  |        |
| 3 vs. 1        | -1,49826 | 1,26803 | -1,182  | 0,411  |        |
| 3 vs. 2        | 0,06975  | 0,81548 | 0,086   | 0,932  |        |
| verb frequency | -0,87694 | 0,51064 | 0,08592 | -1,717 |        |
| age            | -0,08287 | 0,03074 | 0,00701 | -2,696 |        |
| AAT syntax     | 0,42041  | 0,15497 | 0,00667 | 2,713  |        |

**Between population analysis**

|                       | <i>Variance</i> | <i>SD</i> | <i>Estimate</i> | <i>SE</i> | <i>p</i> | $\chi^2$ | <i>z</i> | <i>R-squared</i> | <i>Power*</i> |
|-----------------------|-----------------|-----------|-----------------|-----------|----------|----------|----------|------------------|---------------|
| <i>single models</i>  |                 |           |                 |           |          |          |          |                  |               |
| <b>Group</b>          |                 |           |                 |           |          |          |          | <b>0,206</b>     |               |
| <i>random effects</i> |                 |           |                 |           |          |          |          |                  |               |
| item                  | 0,109           | 0,330     |                 |           | 0,001    | 10,991   |          |                  |               |
| participant           | 0,757           | 0,870     |                 |           | 0,596    | 0,281    |          |                  |               |

*fixed effects*

|            |       |       |       |        |         |
|------------|-------|-------|-------|--------|---------|
| Group      |       |       | 0,000 | 29,329 | 100,00% |
| HS vs. RH* | 0,416 | 0,623 | 0,504 | 0,668  |         |
| HS vs. LH* | 2,478 | 0,470 | 0,000 | 5,275  |         |
| RH vs. LH* | 2,062 | 0,510 | 0,000 | 4,046  |         |

*models with interactions*

|                  |  |  |  |  |              |
|------------------|--|--|--|--|--------------|
| <b>Group*VAN</b> |  |  |  |  | <b>0,238</b> |
|------------------|--|--|--|--|--------------|

*random effects*

|             |       |       |       |       |  |
|-------------|-------|-------|-------|-------|--|
| item        | 0,128 | 0,357 | 0,008 | 6,965 |  |
| participant | 0,560 | 0,748 | 0,552 | 0,354 |  |

*fixed effects*

|                  |  |  |       |        |              |
|------------------|--|--|-------|--------|--------------|
| Group            |  |  | 0,000 | 32,816 |              |
| VAN              |  |  | 0,450 | 1,599  |              |
| Group*VAN        |  |  | 0,186 | 6,179  |              |
| <b>Group*VAO</b> |  |  |       |        | <b>0,270</b> |

*random effects*

|             |        |        |       |       |  |
|-------------|--------|--------|-------|-------|--|
| item        | 0,1169 | 0,3419 | 0,008 | 7,112 |  |
| participant | 0,5706 | 0,7554 | 0,313 | 0,576 |  |

*fixed effects*

|                 |  |  |       |        |              |
|-----------------|--|--|-------|--------|--------------|
| Group           |  |  | 0,000 | 34,184 |              |
| VAO             |  |  | 0,106 | 2,620  |              |
| Group*VAO       |  |  | 0,346 | 2,120  |              |
| <b>Group*VT</b> |  |  |       |        | <b>0,826</b> |

*random effects*

|             |         |        |       |       |  |
|-------------|---------|--------|-------|-------|--|
| item        | 0,13063 | 0,3614 | 0,924 | 0,009 |  |
| participant | 0,01733 | 0,1316 | 0,569 | 0,325 |  |

*fixed effects*

|                        |  |  |       |        |              |
|------------------------|--|--|-------|--------|--------------|
| Group                  |  |  | 0,000 | 26,703 |              |
| VT                     |  |  | 0,003 | 16,228 |              |
| Group*VT               |  |  | 0,226 | 10,596 |              |
| <b>Group*frequency</b> |  |  |       |        | <b>0,222</b> |

*random effects*

|                      |        |        |        |  |       |        |        |           |
|----------------------|--------|--------|--------|--|-------|--------|--------|-----------|
| item                 | 0,1372 | 0,3705 |        |  | 0,094 | 2,797  |        |           |
| participant          | 0,3555 | 0,5963 |        |  | 0,533 | 0,389  |        |           |
| <i>fixed effects</i> |        |        |        |  |       |        |        |           |
| Group                |        |        |        |  | 0,000 | 27,451 |        |           |
| frequency            |        |        |        |  | 0,047 | 3,951  |        |           |
| Group*frequency      |        |        |        |  | 0,021 | 7,718  |        |           |
| HS                   |        |        | 0,372  |  | 0,464 | 0,423  | 0,802  | 0,031 11% |
| RH                   |        |        | -0,046 |  | 0,521 | 0,930  | -0,087 | 0,000 3%  |
| LH*                  |        |        | -1,043 |  | 0,376 | 0,006  | -2,774 | 0,157 82% |

| HP                             | Variance | SD    | Estimate | SE    | p     | $\chi^2$ | z      | R <sup>2</sup> | Power |
|--------------------------------|----------|-------|----------|-------|-------|----------|--------|----------------|-------|
| <i>single predictor models</i> |          |       |          |       |       |          |        |                |       |
| <b>VAN</b>                     |          |       |          |       |       |          |        | 0,008          |       |
| <i>random effects</i>          |          |       |          |       |       |          |        |                |       |
| item                           | 0,000    | 0,000 |          |       | 1,000 | 0,000    |        |                |       |
| participant                    | 0,000    | 0,000 |          |       | 1,000 | 0,000    |        |                |       |
| <i>fixed effects</i>           |          |       |          |       |       |          |        |                |       |
| VAN                            |          |       |          |       | 0,128 | 0,938    |        |                | 7%    |
| <b>VAO</b>                     |          |       |          |       |       |          |        | 0,003          |       |
| <i>random effects</i>          |          |       |          |       |       |          |        |                |       |
| item                           | 0,000    | 0,000 |          |       | 1,000 | 0,000    |        |                |       |
| participant                    | 0,000    | 0,000 |          |       | 1,000 | 0,000    |        |                |       |
| <i>fixed effects</i>           |          |       |          |       |       |          |        |                |       |
| VAO                            |          |       | -0,184   | 0,821 | 0,822 |          | -0,224 |                | 8%    |
| <b>VT</b>                      |          |       |          |       |       |          |        | 0,038          |       |
| <i>random effects</i>          |          |       |          |       |       |          |        |                |       |
| item                           | 0,000    | 0,000 |          |       | 1,000 | 0,000    |        |                |       |
| participant                    | 0,000    | 0,000 |          |       | 1,000 | 0,000    |        |                |       |
| <i>fixed effects</i>           |          |       |          |       |       |          |        |                |       |
| VT                             |          |       |          |       | 0,921 | 0,927    | 0,8932 |                | 3%    |

|             |            |       |       |        |
|-------------|------------|-------|-------|--------|
| ob2 vs. ob1 | -2,316E-13 | 1,419 | 1     | 0      |
| ob3 vs. ob1 | -0,9275    | 1,423 | 0,949 | -0,652 |
| op2 vs. ob1 | -0,7006    | 1,231 | 0,949 | -0,569 |
| op3 vs. ob1 | -2,152E-13 | 1,419 | 1     | 0      |
| ob3 vs. ob2 | -0,9275    | 1,423 | 0,949 | -0,652 |
| op2 vs. ob2 | -0,7006    | 1,231 | 0,949 | -0,569 |
| op3 vs. ob2 | 1,641E-14  | 1,419 | 1     | 0      |
| op2 vs. ob3 | 0,2269     | 1,235 | 1     | 0,184  |
| op3 vs. ob3 | 0,9275     | 1,423 | 0,949 | 0,652  |
| op3 vs. op2 | 0,7006     | 1,231 | 0,949 | 0,569  |

B. RHSP *Variance SD Estimate SE p  $\chi^2$  z R<sup>2</sup> Power*

**single predictor models**

**VAN** **0,103**

*random effects*

|             |       |       |  |       |       |
|-------------|-------|-------|--|-------|-------|
| item        | 0,000 | 0,000 |  | 1,000 | 0,000 |
| participant | 0,000 | 0,000 |  | 1,000 | 0,000 |

*fixed effects*

VAN 0,517 1,322 26%

**VAO** **0,101**

*random effects*

|             |       |       |  |       |       |
|-------------|-------|-------|--|-------|-------|
| item        | 0,000 | 0,000 |  | 1,000 | 0,000 |
| participant | 0,000 | 0,000 |  | 1,000 | 0,000 |

*fixed effects*

VAO 1,220 1,124 0,278 1,086 24%

VT - the estimates of this model are not reliable

**C. healthy participants**

*Variance SD Estimate SE p  $\chi^2$  z R<sup>2</sup> Power*

*single predictor models*

|                                |       |        |       |       |       |        |       |
|--------------------------------|-------|--------|-------|-------|-------|--------|-------|
| <b>VAN</b>                     |       |        |       |       |       |        | 0,008 |
| <i>random effects</i>          |       |        |       |       |       |        |       |
| item                           | 0,000 | 0,000  |       | 1,000 | 0,000 |        |       |
| participant                    | 0,000 | 0,000  |       | 1,000 | 0,000 |        |       |
| <i>fixed effects</i>           |       |        |       |       |       |        |       |
| VAN                            |       |        |       | 0,128 | 0,938 |        | 7%    |
| <b>VAO</b>                     |       |        |       |       |       |        | 0,003 |
| <i>single predictor models</i> |       |        |       |       |       |        |       |
| <i>random effects</i>          |       |        |       |       |       |        |       |
| item                           | 0,000 | 0,000  |       | 1,000 | 0,000 |        |       |
| participant                    | 0,000 | 0,000  |       | 1,000 | 0,000 |        |       |
| <i>fixed effects</i>           |       |        |       |       |       |        |       |
| VAO                            |       | -0,184 | 0,821 | 0,822 |       | -0,224 | 8%    |
| <b>VT</b>                      |       |        |       |       |       |        | 0,038 |
| <i>random effects</i>          |       |        |       |       |       |        |       |
| item                           | 0,000 | 0,000  |       | 1,000 | 0,000 |        |       |
| participant                    | 0,000 | 0,000  |       | 1,000 | 0,000 |        |       |
| <i>fixed effects</i>           |       |        |       |       |       |        |       |
| VT                             |       |        |       | 0,921 | 0,927 |        | 3%    |

Supplementary Table 9: Complete NAVS-G ASPT results

| <i>LHSP</i>                    | <i>Variance</i> | <i>SD</i> | <i>Estimate</i> | <i>SE</i> | <i>p</i> | $\chi^2$ | <i>z</i> | <i>R</i> <sup>2</sup> | <i>Power</i> |
|--------------------------------|-----------------|-----------|-----------------|-----------|----------|----------|----------|-----------------------|--------------|
| <i>single predictor models</i> |                 |           |                 |           |          |          |          |                       |              |
| <b>VAN</b>                     |                 |           |                 |           |          |          |          |                       | <b>0,039</b> |
| <i>random effects</i>          |                 |           |                 |           |          |          |          |                       |              |
| item                           | 0,146           | 0,382     |                 |           | 0,765    | 0,089    |          |                       |              |
| participant                    | 31,202          | 5,586     |                 |           | 0,000    | 103,360  |          |                       |              |

|                       |        |         |        |         |         |               |
|-----------------------|--------|---------|--------|---------|---------|---------------|
| <i>fixed effects</i>  |        |         |        |         |         |               |
| VAN                   |        |         |        | 0,000   | 15,919  | 0,039035 0,66 |
| 2 vs. 1               |        | -3,5965 | 1,2248 | 0,00996 | -2,936  |               |
| 3 vs. 1               |        | -2,2592 | 1,1763 | 0,05478 | -1,921  |               |
| 3 vs. 2               |        | 1,3373  | 0,5314 | 0,01777 | 2,517   |               |
| <b>VAO</b>            |        |         |        |         |         | <b>0,006</b>  |
| <i>random effects</i> |        |         |        |         |         |               |
| item                  | 0,947  | 0,973   |        | 0,109   | 2,576   |               |
| participant           | 27,614 | 5,255   |        | 0,000   | 99,941  |               |
| <i>fixed effects</i>  |        |         |        |         |         |               |
| VAO                   |        | -0,882  | 0,637  | 0,166   | -1,386  | 24%           |
| <b>VT</b>             |        |         |        |         |         | <b>0,039</b>  |
| <i>random effects</i> |        |         |        |         |         |               |
| item                  | 0,076  | 0,276   |        | 0,875   | 0,025   |               |
| participant           | 31,973 | 5,655   |        | 0,000   | 103,790 |               |
| <i>fixed effects</i>  |        |         |        |         |         |               |
| VT                    |        |         |        | 0,002   | 16,896  | 78%           |
| <b>NIHSS</b>          |        |         |        |         |         | <b>0,241</b>  |
| <i>random effects</i> |        |         |        |         |         |               |
| item                  | 0,994  | 0,997   |        | 0,084   | 2,976   |               |
| participant           | 7,340  | 2,709   |        | 0,000   | 25,374  |               |
| <i>fixed effects</i>  |        |         |        |         |         |               |
| NIHSS                 |        | -0,924  | 0,418  | 0,027   | -2,209  | 61%           |
| <b>mRS</b>            |        |         |        |         |         | <b>0,280</b>  |
| <i>random effects</i> |        |         |        |         |         |               |
| item                  | 1,013  | 1,007   |        | 0,082   | 3,031   |               |
| participant           | 6,703  | 2,589   |        | 0,000   | 26,090  |               |
| <i>fixed effects</i>  |        |         |        |         |         |               |
| mRS                   |        | -2,906  | 1,212  | 0,016   | -2,938  | 69%           |
| <b>BI</b>             |        |         |        |         |         | <b>0,281</b>  |
| <i>random effects</i> |        |         |        |         |         |               |
| item                  | 1,060  | 1,029   |        | 0,073   | 3,207   |               |

|                        |       |          |          |         |        |         |     |
|------------------------|-------|----------|----------|---------|--------|---------|-----|
| participant            | 4,466 | 2,113    |          | 0,000   | 12,939 |         |     |
| <i>fixed effects</i>   |       |          |          |         |        |         |     |
| BI*                    |       | 0,170    | 0,063    | 0,006   | 2,721  |         | 84% |
| <b>adjusted models</b> |       |          |          |         |        |         |     |
| <b>VAN + NIHSS</b>     |       |          |          |         |        | 0,327   |     |
| <i>random effects</i>  |       |          |          |         |        |         |     |
| item                   | 0,128 | 0,358    |          | 0,792   | 0,069  |         |     |
| participant            | 7,612 | 2,759    |          | 0,000   | 26,176 |         |     |
| <i>fixed effects</i>   |       |          |          |         |        |         |     |
| VAN                    |       |          |          | 0,000   | 16,026 |         | 87% |
| 2 vs. 1                |       | -3,586   | 1,220    | 0,010   | -2,939 |         |     |
| 3 vs. 1                |       | -2,261   | 1,174    | 0,054   | -1,925 |         |     |
| 3 vs. 2                |       | 1,325    | 0,525    | 0,017   | 2,523  |         |     |
| NIHSS                  |       | -0,952   | 0,431    | 0,027   | -2,211 |         |     |
| <b>VT + NIHSS</b>      |       |          |          |         |        | 0,329   |     |
| <i>random effects</i>  |       |          |          |         |        |         |     |
| item                   | 0,056 | 0,238    |          | 0,907   | 0,014  |         |     |
| participant            | 7,684 | 2,772    |          | 0,000   | 26,365 |         |     |
| <i>fixed effects</i>   |       |          |          |         |        |         |     |
| VT                     |       |          |          | 0,002   | 16,896 | 0,32872 | 87% |
| ob2ob1                 |       | -2,24222 | 1,26263  | 0,1082  | -1,776 |         |     |
| ob3 vs. ob1            |       | -4,205   | 1,402    | 0,024   | -2,998 |         |     |
| op2 vs. ob1            |       | -2,24243 | 1,188326 | 0,0986  | -1,887 |         |     |
| op3 vs. ob1            |       | -3,416   | 1,210    | 0,024   | -2,823 |         |     |
| ob3 vs. ob2            |       | -1,96233 | 0,993949 | 0,0967  | -1,974 |         |     |
| op2 vs. ob2            |       | -0,00021 | 0,741602 | 0,9998  | 0      |         |     |
| op3 vs. ob2            |       | -1,17369 | 0,724765 | 0,1317  | -1,619 |         |     |
| op2 vs. ob3            |       | 1,962122 | 0,896349 | 0,0953  | 2,189  |         |     |
| op3 vs. ob3            |       | 0,788637 | 0,829337 | 0,3796  | 0,951  |         |     |
| op3 vs. op2            |       | -1,17349 | 0,584159 | 0,0967  | -2,009 |         |     |
| NIHSS                  |       | -0,9556  | 0,4338   | 0,02760 | -2,203 |         |     |
| <b>VT + Barthel</b>    |       |          |          |         |        |         |     |

| <i>fixed effects</i>               |                 |           |                 |           |          |          |          |                  |              |
|------------------------------------|-----------------|-----------|-----------------|-----------|----------|----------|----------|------------------|--------------|
| VT                                 |                 |           |                 |           | 0,00208  |          | 16,835   | 0,389095         | 0,89         |
| ob2 vs. ob1                        |                 |           | -2,27673        | 1,276271  | 0,10640  |          |          |                  | -1,784       |
| ob3 vs. ob1                        |                 |           | -4,25276        | 1,415509  | 0,02310  |          |          |                  | -3,004       |
| op2 vs. ob1                        |                 |           | -2,27723        | 1,200333  | 0,09640  |          |          |                  | -1,897       |
| op3 vs. ob1                        |                 |           | -3,46884        | 1,224748  | 0,02310  |          |          |                  | -2,832       |
| ob3 vs. ob2                        |                 |           | -1,97603        | 1,004822  | 0,09640  |          |          |                  | -1,967       |
| op2 vs. ob2                        |                 |           | -0,0005         | 0,755128  | 0,99950  |          |          |                  | -0,001       |
| op3 vs. ob2                        |                 |           | -1,19211        | 0,738454  | 0,13310  |          |          |                  | -1,614       |
| op2 vs. ob3                        |                 |           | 1,975536        | 0,904304  | 0,09640  |          |          |                  | 2,185        |
| op3 vs. ob3                        |                 |           | 0,783919        | 0,834165  | 0,38590  |          |          |                  | 0,94         |
| op3 vs. op2                        |                 |           | -1,19162        | 0,595039  | 0,09640  |          |          |                  | -2,003       |
| Barthel                            |                 |           | 0,17321         | 0,06342   | 0,00631  |          |          |                  | 2,731        |
| <b>between population analyses</b> |                 |           |                 |           |          |          |          |                  |              |
|                                    | <i>Variance</i> | <i>SD</i> | <i>Estimate</i> | <i>SE</i> | <i>p</i> | $\chi^2$ | <i>z</i> | <i>R-squared</i> | <i>Power</i> |
| <i>Single models</i>               |                 |           |                 |           |          |          |          |                  |              |
| <b>Group</b>                       |                 |           |                 |           |          |          |          | <b>0,093</b>     |              |
| <i>random effects</i>              |                 |           |                 |           |          |          |          |                  |              |
| item                               | 0,451           | 0,672     |                 |           | 0,128    | 2,321    |          |                  |              |
| participant                        | 4,350           | 2,086     |                 |           | 0,000    | 89,156   |          |                  |              |
| <i>fixed effects</i>               |                 |           |                 |           |          |          |          |                  |              |
| Group                              |                 |           |                 |           | 0,107    | 4,464    |          |                  | 36%          |
| <b>Models with interactions</b>    |                 |           |                 |           |          |          |          |                  |              |
| <b>Group*VAN</b>                   |                 |           |                 |           |          |          |          | <b>0,102</b>     |              |
| <i>random effects</i>              |                 |           |                 |           |          |          |          |                  |              |
| item                               | 0,213           | 0,462     |                 |           | 0,475    | 0,512    |          |                  |              |
| participant                        | 4,815           | 2,194     |                 |           | 0,000    | 93,049   |          |                  |              |
| <i>fixed effects</i>               |                 |           |                 |           |          |          |          |                  |              |
| Group                              |                 |           |                 |           | 0,093    | 4,748    |          |                  |              |
| VAN                                |                 |           |                 |           | 0,074    | 5,201    |          |                  |              |
| Group*VAN                          |                 |           |                 |           | 0,175    | 6,338    |          |                  |              |



|                       |       |       |       |        |              |
|-----------------------|-------|-------|-------|--------|--------------|
| <b>Group*VAO</b>      |       |       |       |        | <b>0,113</b> |
| <i>random effects</i> |       |       |       |        |              |
| item                  | 0,440 | 0,663 | 0,129 | 2,300  |              |
| participant           | 4,457 | 2,111 | 0,000 | 89,946 |              |
| <i>fixed effects</i>  |       |       |       |        |              |
| Group                 |       |       | 0,095 | 4,698  |              |
| VAO                   |       |       | 0,647 | 0,209  |              |
| Group*VAO             |       |       | 0,127 | 4,122  |              |
| <b>Group*VT</b>       |       |       |       |        | <b>0,124</b> |
| <i>random effects</i> |       |       |       |        |              |
| item                  | 0,066 | 0,258 | 0,803 | 0,062  |              |
| participant           | 4,771 | 2,184 | 0,000 | 93,044 |              |
| <i>fixed effects</i>  |       |       |       |        |              |
| Group                 |       |       | 0,105 | 4,509  |              |
| VT                    |       |       | 0,073 | 8,574  |              |
| Group*VT              |       |       | 0,530 | 7,064  |              |

**Supplementary Table 10: Complete NAVS-G SPPT results**

|                                |                 |           |                 |           |          |                      |          |                      |              |
|--------------------------------|-----------------|-----------|-----------------|-----------|----------|----------------------|----------|----------------------|--------------|
| A. NAVS-G SPPT in LHSP         |                 |           |                 |           |          |                      |          |                      |              |
|                                | <i>Variance</i> | <i>SD</i> | <i>Estimate</i> | <i>SE</i> | <i>p</i> | <i>χ<sup>2</sup></i> | <i>z</i> | <i>R<sup>2</sup></i> | <i>Power</i> |
| <b>Single predictor models</b> |                 |           |                 |           |          |                      |          |                      |              |
| <b>Canonicity</b>              |                 |           |                 |           |          |                      |          |                      |              |
| <b>0,129</b>                   |                 |           |                 |           |          |                      |          |                      |              |
| <i>random effects</i>          |                 |           |                 |           |          |                      |          |                      |              |
| item                           | 2,459           | 1,568     |                 |           | 0,000    | 55,380               |          |                      |              |
| participant                    | 3,318           | 1,821     |                 |           | 0,000    | 118,240              |          |                      |              |
| <i>fixed effects</i>           |                 |           |                 |           |          |                      |          |                      |              |

|                                     |              |        |                 |               |             |     |
|-------------------------------------|--------------|--------|-----------------|---------------|-------------|-----|
| Canonicity                          | 2,318        | 0,661  | 0,000           | 3,504         | 0,1292566   | 98% |
| <b>Canonicity without relatives</b> | <b>0,108</b> |        |                 |               |             |     |
| <i>random effects</i>               |              |        |                 |               |             |     |
| item                                | 0,321        | 0,567  | 0,317           | 1,003         |             |     |
| participant                         | 10,601       | 3,256  | 0,000           | 88,993        |             |     |
| <i>fixed effects</i>                |              |        |                 |               |             |     |
| Canonicity without relatives        | 2,618        | 0,551  | <.001           | 4,748         | 0,1079276   | 21% |
| <b>Sentence type</b>                | <b>0,394</b> |        |                 |               |             |     |
| <i>random effects</i>               |              |        |                 |               |             |     |
| item                                | 0,000        | 0,000  | 1,000           | 0,000         |             |     |
| participant                         | 3,478        | 1,865  | 0,000           | 122,960       |             |     |
| <i>fixed effects</i>                |              |        |                 |               |             |     |
| <b>Sentence type</b>                |              |        | <b>&lt;.001</b> | <b>82,395</b> | <b>100%</b> |     |
| P vs. A                             | -3,981       | 0,8486 | 0,00000543      | -4,691        |             |     |
| OW vs. SW                           | -1,3988      | 0,4998 | 0,0057          | -2,799        |             |     |
| OR vs. SR*                          | -2,0581      | 0,4672 | 0,0000151       | -4,405        |             |     |
| SR vs. A                            | -4,7911      | 0,8618 | 6,76E-08        | -5,56         |             |     |
| SW vs. A                            | -2,4767      | 0,8461 | 0,00427         | -2,927        |             |     |
| OR vs. P                            | -2,8681      | 0,5018 | 3,64E-08        | -5,716        |             |     |
| OW vs. P                            | 0,1055       | 0,4551 | 0,81664         | 0,232         |             |     |
| OR vs. OW                           | -2,9736      | 0,5067 | 2,19E-08        | -5,869        |             |     |
| SR vs. SW                           | -2,3144      | 0,5152 | 0,0000117       | -4,492        |             |     |
| OR vs. non-OR                       | -12,2722     | 1,6902 | 3,85E-12        | -7,261        |             |     |
| <b>NIHSS</b>                        | <b>0,090</b> |        |                 |               |             |     |
| <i>random effects</i>               |              |        |                 |               |             |     |
| item                                | 3,796        | 1,948  | 0,000           | 88,997        |             |     |
| participant                         | 2,394        | 1,547  | 0,000           | 83,745        |             |     |
| <i>fixed effects</i>                |              |        |                 |               |             |     |
| NIHSS                               | -0,466       | 0,205  | 0,023           | -2,277        |             | 66% |
| <b>AAT.ss</b>                       | <b>0,177</b> |        |                 |               |             |     |
| <i>random effects</i>               |              |        |                 |               |             |     |
| item                                | 3,785        | 1,946  | 0,000           | 89,088        |             |     |

|                                              |       |       |       |       |              |           |
|----------------------------------------------|-------|-------|-------|-------|--------------|-----------|
| participant                                  | 1,470 | 1,213 |       | 0,000 | 47,805       |           |
| <i>fixed effects</i>                         |       |       |       |       |              |           |
| AAT.ss                                       |       |       | 0,320 | 0,083 | 0,000        | 3,867 96% |
| <b>AAT.sy*</b>                               |       |       |       |       | <b>0,135</b> |           |
| <i>random effects</i>                        |       |       |       |       |              |           |
| item                                         | 3,790 | 1,947 |       | 0,000 | 88,984       |           |
| participant                                  | 1,934 | 1,391 |       | 0,000 | 67,145       |           |
| <i>fixed effects</i>                         |       |       |       |       |              |           |
| AAT.sy                                       |       |       | 0,845 | 0,278 | 0,002        | 3,038 85% |
| <b>Aph.severity</b>                          |       |       |       |       | <b>0,168</b> |           |
| <i>random effects</i>                        |       |       |       |       |              |           |
| item                                         | 3,774 | 1,943 |       | 0,000 | 72,953       |           |
| participant                                  | 1,665 | 1,290 |       | 0,000 | 49,338       |           |
| <i>fixed effects</i>                         |       |       |       |       |              |           |
| Aph.se                                       |       |       | 1,125 | 0,337 | 0,001        | 3,338 0%  |
| <b>Token Test</b>                            |       |       |       |       | <b>0,111</b> |           |
| <i>random effects</i>                        |       |       |       |       |              |           |
| item                                         | 3,930 | 1,982 |       | 0,000 | 67,291       |           |
| participant                                  | 2,537 | 1,593 |       | 0,000 | 70,892       |           |
| <i>fixed effects</i>                         |       |       |       |       |              |           |
| Token Test                                   |       |       | 0,178 | 0,080 | 0,025        | 2,236 0%  |
| <b>adjusted models</b>                       |       |       |       |       |              |           |
| <b>Canonicity + AAT.ss</b>                   |       |       |       |       | <b>0,307</b> |           |
| <i>random effects</i>                        |       |       |       |       |              |           |
| item                                         | 2,443 | 1,563 |       | 0,000 | 55,394       |           |
| participant                                  | 1,457 | 1,207 |       | 0,000 | 47,721       |           |
| <i>fixed effects</i>                         |       |       |       |       |              |           |
| Canonicity                                   |       |       | 2,318 | 0,661 | 0,000        | 3,506 96% |
| AAT.ss                                       |       |       | 0,320 | 0,083 | 0,000        | 3,872     |
| <b>Canonicity without relatives + AAT.ss</b> |       |       |       |       | <b>0,449</b> |           |

|                                                  |        |         |        |          |        |              |      |
|--------------------------------------------------|--------|---------|--------|----------|--------|--------------|------|
| <i>random effects</i>                            |        |         |        |          |        |              |      |
| item                                             | 0,3365 | 0,5801  |        | 0,300    | 1,073  |              |      |
| participant                                      | 4,2219 | 2,0547  |        | 0,000    | 35,170 |              |      |
| <i>fixed effects</i>                             |        |         |        |          |        |              |      |
| canonicity without relatives                     |        | 2,6481  | 0,5583 | 0,000    | 4,743  | 0,4446722    | 99%  |
| AAT.ss                                           |        | 0,5021  | 0,164  | 0,002    | 3,062  |              |      |
| <b>Sentence type + AAT.ss*</b>                   |        |         |        |          |        | <b>0,569</b> |      |
| <i>random effects</i>                            |        |         |        |          |        |              |      |
| item                                             | 0,000  | 0,000   |        | 1,000    | 0,000  |              |      |
| participant                                      | 1,524  | 1,235   |        | 0,000    | 49,173 |              |      |
| <i>fixed effects</i>                             |        |         |        |          |        |              |      |
| Sentence type                                    |        |         |        | 0,000    | 82,377 | 0,5689824    | 100% |
| P vs. A*                                         |        | -3,993  | 0,848  | 0,000    |        | -4,711       |      |
| OW vs. SW*                                       |        | -1,407  | 0,502  | 0,006    |        | -2,805       |      |
| OR vs. SR*                                       |        | -2,044  | 0,466  | 0,000    |        | -4,390       |      |
| SR vs. A*                                        |        | -4,807  | 0,861  | 0,000    |        | -5,583       |      |
| SW vs. A*                                        |        | -2,480  | 0,845  | 0,004    |        | -2,935       |      |
| OR vs. P*                                        |        | -2,858  | 0,501  | 0,000    |        | -5,701       |      |
| OW vs. P                                         |        | 0,1062  | 0,4575 | 0,8164   |        | 0,232        |      |
| OR vs. OW                                        |        | -2,9645 | 0,5064 | 0,0000   |        | -5,854       |      |
| SR vs. SW*                                       |        | -2,327  | 0,517  | 0,000    |        | -4,500       |      |
| non-OR vs. OR*                                   |        | -12,239 | 1,685  | 0,000    |        | -7,264       |      |
| relative vs. non-relative                        |        | -3,0568 | 0,5889 | 0,00000  |        | -5,191       |      |
| AAT.ss                                           |        | 0,329   | 0,085  | 0,000    |        | 3,866        |      |
| <b>Canonicity + AAT syntax</b>                   |        |         |        |          |        |              |      |
| <i>fixed effects</i>                             |        |         |        |          |        |              |      |
| Canonicity                                       |        | -2,3161 | 0,6608 | 0,000457 |        | -3,505       |      |
| AAT syntax                                       |        | 0,8436  | 0,2773 | 0,002348 |        | 3,042        |      |
| <b>Canonicity without relatives + AAT syntax</b> |        |         |        |          |        |              |      |
| <i>fixed effects</i>                             |        |         |        |          |        |              |      |

|                                             |       |       |          |        |         |  |              |
|---------------------------------------------|-------|-------|----------|--------|---------|--|--------------|
| Canonicity                                  |       |       | 2,6405   | 0,5578 | 0,00000 |  | 4,734        |
| AAT syntax                                  |       |       | 1,6817   | 0,5683 | 0,00309 |  | 2,959        |
| <b>sentence type + AAT syntax</b>           |       |       |          |        |         |  |              |
| <i>fixed effects</i>                        |       |       |          |        |         |  |              |
| sentence type                               |       |       |          |        | 0,00000 |  | 69,247       |
| P vs. A                                     |       |       | -3,9791  | 0,8471 | 0,0000  |  | -4,698       |
| OW vs. SW                                   |       |       | -1,3985  | 0,5000 | 0,0057  |  | -2,797       |
| OR vs. SR                                   |       |       | -2,0639  | 0,4685 | 0,0000  |  | -4,405       |
| SR vs. A                                    |       |       | -4,7885  | 0,8603 | 0,0000  |  | -5,566       |
| SW vs. A                                    |       |       | -2,4753  | 0,8447 | 0,0042  |  | -2,93        |
| OR vs. P                                    |       |       | -2,8732  | 0,5031 | 0,0000  |  | -5,712       |
| OW vs. P                                    |       |       | 0,1054   | 0,4554 | 0,8170  |  | 0,231        |
| OR vs. OW                                   |       |       | -2,9786  | 0,5079 | 0,0000  |  | -5,864       |
| SR vs. SW                                   |       |       | -2,3132  | 0,5154 | 0,0000  |  | -4,488       |
| OR vs. non-OR                               |       |       | -12,2928 | 1,6960 | 0,0000  |  | -7,248       |
| relative vs. non-relative                   |       |       | -3,0543  | 0,5885 | 0,0000  |  | -5,190       |
| AAT syntax                                  |       |       | 0,8547   | 0,2834 | 0,00256 |  | 3,016        |
| <b>Canonicity + NIHSS</b>                   |       |       |          |        |         |  | <b>0,219</b> |
| <i>random effects</i>                       |       |       |          |        |         |  |              |
| item                                        | 2,450 | 1,565 |          |        | 0,000   |  | 55,355       |
| participant                                 | 2,373 | 1,541 |          |        | 0,000   |  | 83,690       |
| <i>fixed effects</i>                        |       |       |          |        |         |  |              |
| Canonicity                                  |       |       | 2,316    | 0,661  | 0,000   |  | 3,505        |
| NIHSS                                       |       |       | -0,465   | 0,204  | 0,023   |  | -2,281       |
| <b>Canonicity without relatives + NIHSS</b> |       |       |          |        |         |  | <b>0,274</b> |
| <i>random effects</i>                       |       |       |          |        |         |  |              |
| item                                        | 0,330 | 0,574 |          |        | 0,307   |  | 1,044        |
| participant                                 | 8,043 | 2,836 |          |        | 0,000   |  | 68,434       |
| <i>fixed effects</i>                        |       |       |          |        |         |  |              |
| Canonicity                                  |       |       | 2,629    | 0,554  | 0,000   |  | 4,742        |
| NIHSS                                       |       |       | -0,783   | 0,420  | 0,062   |  | -1,864       |

| <b>Sentence type + NIHSS</b>       |                 |           |                 |           |          |           |           |                  |              | 0,482 |
|------------------------------------|-----------------|-----------|-----------------|-----------|----------|-----------|-----------|------------------|--------------|-------|
| <i>random effects</i>              |                 |           |                 |           |          |           |           |                  |              |       |
| item                               | 0,000           | 0,000     |                 |           | 1,000    | 0,000     |           |                  |              |       |
| participant                        | 2,488           | 1,577     |                 |           | 0,000    | 86,779    |           |                  |              |       |
| <i>fixed effects</i>               |                 |           |                 |           |          |           |           |                  |              |       |
| Sentence type                      |                 |           |                 |           | <.001    | 69,185    |           |                  |              | 100%  |
| P vs. A*                           |                 |           | -3,974          | 0,845     | 0,000    |           | -4,702    |                  |              |       |
| OW vs. SW*                         |                 |           | -1,401          | 0,500     | 0,006    |           | -2,800    |                  |              |       |
| OR vs. SR*                         |                 |           | -2,056          | 0,467     | 0,000    |           | -4,403    |                  |              |       |
| SR vs. A*                          |                 |           | -4,785          | 0,858     | 0,000    |           | -5,574    |                  |              |       |
| NIHSS                              |                 |           | -0,477          | 0,210     | 0,023    |           | -2,276    |                  |              |       |
| <b>Sentence type + education</b>   |                 |           |                 |           |          |           |           |                  |              |       |
| <i>fixed effects</i>               |                 |           |                 |           |          |           |           |                  |              |       |
| Sentence type                      |                 |           |                 |           | 1,54E-13 | 69,155    | 0,3944695 |                  |              | 100%  |
| <b>between population analysis</b> |                 |           |                 |           |          |           |           |                  |              |       |
|                                    | <i>Variance</i> | <i>SD</i> | <i>Estimate</i> | <i>SE</i> | <i>p</i> | <i>χ2</i> | <i>z</i>  | <i>R-squared</i> | <i>Power</i> |       |
| <i>Single predictor models</i>     |                 |           |                 |           |          |           |           |                  |              |       |
| <b>Group</b>                       |                 |           |                 |           |          |           |           |                  |              | 0,229 |
| <i>random effects</i>              |                 |           |                 |           |          |           |           |                  |              |       |
| item                               | 2,452           | 1,566     |                 |           | 0,000    | 186,180   |           |                  |              |       |
| participant                        | 2,896           | 1,702     |                 |           | 0,000    | 149,120   |           |                  |              |       |
| <i>fixed effects</i>               |                 |           |                 |           |          |           |           |                  |              |       |
| Group                              |                 |           |                 |           | 0,00000  | 35,736    |           |                  |              | 100%  |
| HS vs. RH                          |                 |           | 1,078           | 0,625     | 0,084    |           | 1,727     |                  |              |       |
| HS vs. LH                          |                 |           | 3,857           | 0,620     | 0,000    |           | 6,226     |                  |              |       |
| RH vs. LH                          |                 |           | 2,779           | 0,650     | 0,000    |           | 4,278     |                  |              |       |
| <i>models with interactions</i>    |                 |           |                 |           |          |           |           |                  |              |       |
| <b>Group*canonicity</b>            |                 |           |                 |           |          |           |           |                  |              | 0,317 |
| <i>random effects</i>              |                 |           |                 |           |          |           |           |                  |              |       |

|                                           |       |       |       |       |              |     |
|-------------------------------------------|-------|-------|-------|-------|--------------|-----|
| item                                      | 2,472 | 1,572 |       | 0,000 | 120,900      |     |
| participant                               | 1,920 | 1,386 |       | 0,000 | 149,770      |     |
| <i>fixed effects</i>                      |       |       |       |       |              |     |
| Group                                     |       |       |       | 0,000 | 40,021       |     |
| Canonicity                                |       |       |       | 0,000 | 12,526       |     |
| Group*Canonicity                          |       |       |       | 0,512 | 0,774        |     |
| <b>Group*canonicity without relatives</b> |       |       |       |       | <b>0,143</b> |     |
| <i>random effects</i>                     |       |       |       |       |              |     |
| item                                      | 3,800 | 1,949 |       | 0,075 | 3,170        |     |
| participant                               | 0,316 | 0,562 |       | 0,000 | 80,989       |     |
| <i>fixed effects</i>                      |       |       |       |       |              |     |
| Group                                     |       |       |       | 0,000 | 15,269       |     |
| Canonicity without relatives              |       |       |       | 0,000 | 17,310       |     |
| Group*Canonicity without relatives        |       |       |       | 0,029 | 7,071        |     |
| <i>Canonical</i>                          |       |       |       |       |              | 56% |
| HS vs. RH                                 |       | 0,641 | 1,036 | 0,536 | 0,619        |     |
| HS vs. LH                                 |       | 2,450 | 0,901 | 0,020 | 2,718        |     |
| RH vs. LH                                 |       | 1,809 | 0,950 | 0,085 | 1,904        |     |
| <i>Non-Canonical</i>                      |       |       |       |       |              | 97% |
| HS vs. RH                                 |       | 2,426 | 1,104 | 0,028 | 2,197        |     |
| HS vs. LH                                 |       | 4,705 | 1,086 | 0,000 | 4,333        |     |
| RH vs. LH                                 |       | 2,280 | 0,986 | 0,028 | 2,312        |     |

|                            |       |       |  |       |              |
|----------------------------|-------|-------|--|-------|--------------|
| <b>Group*Sentence type</b> |       |       |  |       | <b>0,441</b> |
| <i>random effects</i>      |       |       |  |       |              |
| item                       | 2,723 | 1,650 |  | 0,068 | 3,343        |
| participant                | 0,128 | 0,358 |  | 0,000 | 155,900      |
| <i>fixed effects</i>       |       |       |  |       |              |
| Group                      |       |       |  | 0,000 | 32,619       |
| Sentence type              |       |       |  | 0,000 | 101,713      |
| Group*Sentence type        |       |       |  | 0,013 | 22,341       |

|                             |       |       |       |         |       |                                                                                       |
|-----------------------------|-------|-------|-------|---------|-------|---------------------------------------------------------------------------------------|
| <i>Active</i>               |       |       |       |         |       |                                                                                       |
| Group                       |       |       | 0,973 | 0,056   | 0,002 | 1%                                                                                    |
| <i>Passive</i>              |       |       |       |         |       |                                                                                       |
| Group                       |       |       | 0,198 | 3,242   | 0,182 | 9%                                                                                    |
| <i>Subject Wh-questions</i> |       |       |       |         |       |                                                                                       |
| Group                       |       |       | 0,051 | 5,934   | 0,179 | 43%                                                                                   |
| HS>RH                       | 0,621 | 1,303 | 0,634 |         | 0,477 |                                                                                       |
| HS>LH                       | 2,955 | 1,128 | 0,026 |         | 2,621 |                                                                                       |
| RH>LH                       | 2,334 | 1,187 | 0,074 |         | 1,967 |                                                                                       |
| <i>Object Wh-questions</i>  |       |       |       |         |       |                                                                                       |
| Group                       |       |       | 0,013 | 8,691   | 0,272 | 66%                                                                                   |
| HS>RH                       | 3,010 | 1,406 | 0,048 |         | 2,141 |                                                                                       |
| HS>LH                       | 4,905 | 1,479 | 0,003 |         | 3,316 |                                                                                       |
| RH>LH                       | 1,895 | 1,333 | 0,155 |         | 1,421 |                                                                                       |
| <i>Subject-Relative</i>     |       |       |       |         |       |                                                                                       |
| Group                       |       |       | 0,000 | 24,200  | 0,349 | 94%                                                                                   |
| HS>RH                       | 0,509 | 1,309 | 0,698 |         | 0,389 |                                                                                       |
| HS>LH                       | 5,489 | 1,486 | 0,001 |         | 3,693 |                                                                                       |
| RH>LH                       | 4,980 | 1,631 | 0,003 |         | 3,054 |                                                                                       |
| <i>Object-Relative</i>      |       |       |       |         |       |                                                                                       |
| Group                       |       |       | 0,000 | 30,263  | 0,294 | 100%                                                                                  |
| HS>RH                       | 0,566 | 0,689 | 0,411 |         | 0,822 |                                                                                       |
| HS>LH                       | 3,771 | 0,794 | 0,000 |         | 4,749 |                                                                                       |
| RH>LH                       | 3,205 | 0,799 | 0,000 |         | 4,011 |                                                                                       |
| Group*Sentence type*Age     |       |       |       |         | 0,655 |  |
| random effects              |       |       |       |         |       |                                                                                       |
| item                        | 2,179 | 1,476 | 0,053 | 3,754   |       |  |
| participant                 | 0,143 | 0,379 | 0,000 | 129,550 |       |  |
| fixed effects               |       |       |       |         |       |                                                                                       |
| Group                       |       |       | 0,000 | 38,928  |       |  |
| Sentence type               |       |       | 0,000 | 83,104  |       |                                                                                       |



|                                      |          |         |           |         |             |
|--------------------------------------|----------|---------|-----------|---------|-------------|
| Age                                  | -0,066   | 0,024   | 0,006     | -2,728  |             |
| <i>Group*Age:</i>                    |          |         | .032      | 12,238  |             |
| effect of age in HP                  | -0,09533 | 0,02877 | 0,002763  | -3,314  | 98%         |
| effect of age in RH                  | -0,06288 | 0,02883 | 0,0438    | -2,181  | 62,50%      |
| effect of age in LH                  | -0,06899 | 0,05757 | 0,2308    | -1,198  | 28,50%      |
| <i>Sentence Type*Age</i>             |          |         | 0,032     | 12,238  |             |
| Active                               |          |         | 0,9576    | 0,3782  |             |
| Passive                              |          |         | 0,9576    | 0,6301  |             |
| Subject Wh-questions                 |          |         | 0,9576    | 0,0865  |             |
| Object Wh-questions                  |          |         | 0,9576    | 3,3847  |             |
| Subject Relative                     |          |         | 0,9576    | 1,1319  |             |
| Object-Relative                      |          |         | 0,9576    | 1,8153  |             |
| <i>Group*Sentence Type*Age</i>       |          |         | 0,021835  | 23,7732 | .654        |
| sentence type*age in HS              |          |         | 0,14148   | 9,3946  | .243        |
| sentence type*age in RH              |          |         | 0,09609   | 12,209  | .103        |
| sentence type*age in LH              |          |         | 0,5175    | 4,2252  | .031        |
| <b>Group*Sentence type*Education</b> |          |         |           |         | <b>.947</b> |
| random effects                       |          |         |           |         |             |
| item                                 | 1,490    | 1,221   | 0,046     | 3,974   |             |
| participant                          | 0,150    | 0,387   | 0,000     | 97,701  |             |
| fixed effects                        |          |         |           |         |             |
| Group                                |          |         | 0,000     | 47,131  |             |
| Sentence type                        |          |         | 0,000     | 75,390  |             |
| Ed.Qual                              | 1,423    | 0,388   | 0,000     | 3,671   |             |
| <i>Sentence Type*Ed.q.</i>           |          |         | 0,067     | 10,300  |             |
| <i>Group*Sentence Type*Ed.q.</i>     |          |         | 0,0002486 | 36,714  |             |
| Active                               |          |         | 0,79725   | 1,264   |             |
| Passive                              |          |         | 0,79725   | 1,3334  |             |
| Subject Wh-questions                 |          |         | 0,8648    | 0,2906  |             |
| Object Wh-questions                  |          |         | 0,5538    | 3,3789  |             |
| Subject Relative                     |          |         | 0,8648    | 0,4065  |             |

|                 |             |       |      |        |  |
|-----------------|-------------|-------|------|--------|--|
| Object-Relative | .341 (0,5*) | 5,732 |      |        |  |
| HS              | 0,000       | 4,667 | .49  | 100%   |  |
| RH              | 0,0303      | 2,323 | .24  | 55%    |  |
| LH              | 0,1255      | 1,532 | .007 | 33,50% |  |

\*uncorrect

| <b>B NAVS-G SPPT in RHSP without aphasia</b> |                 |           |                 |           |          |          |          |                      |              |
|----------------------------------------------|-----------------|-----------|-----------------|-----------|----------|----------|----------|----------------------|--------------|
|                                              | <i>Variance</i> | <i>SD</i> | <i>Estimate</i> | <i>SE</i> | <i>p</i> | $\chi^2$ | <i>z</i> | <i>R<sup>2</sup></i> | <i>Power</i> |
| <b>Single predictor models</b>               |                 |           |                 |           |          |          |          |                      |              |
| <b>Canonicity</b>                            |                 |           |                 |           |          |          |          | <b>0,073</b>         |              |
| <i>random effects</i>                        |                 |           |                 |           |          |          |          |                      |              |
| item                                         | 2,284           | 1,511     |                 |           | 0,000    | 28,700   |          |                      |              |
| participant                                  | 0,958           | 0,979     |                 |           | 0,008    | 6,971    |          |                      |              |
| <i>fixed effects</i>                         |                 |           |                 |           |          |          |          |                      |              |
| Canonicity                                   |                 |           | 1,438           | 0,780     | 0,065    |          | 1,844    | 0,07347395           | 49%          |
| <b>Canonicity without relatives</b>          |                 |           |                 |           |          |          |          | <b>0,040</b>         |              |
| <i>random effects</i>                        |                 |           |                 |           |          |          |          |                      |              |
| item                                         | 2,460           | 1,568     |                 |           | 0,000    | 13,149   |          |                      |              |
| participant                                  | 0,457           | 0,676     |                 |           | 0,455    | 0,559    |          |                      |              |
| <i>fixed effects</i>                         |                 |           |                 |           |          |          |          |                      |              |
| Canonicity without relatives                 |                 |           | 1,017           | 1,086     | 0,349    |          | 0,936    |                      | 19%          |
| <b>Sentence type</b>                         |                 |           |                 |           |          |          |          | <b>0,234</b>         |              |
| <i>random effects</i>                        |                 |           |                 |           |          |          |          |                      |              |
| item                                         | 1,370           | 1,171     |                 |           | 0,000    | 15,134   |          |                      |              |
| participant                                  | 0,989           | 0,994     |                 |           | 0,008    | 7,075    |          |                      |              |
| <i>fixed effects</i>                         |                 |           |                 |           |          |          |          |                      |              |
| Sentence type                                |                 |           |                 |           | 0,018    | 13,672   |          |                      | 82%          |

|                             |       |        |        |        |        |              |
|-----------------------------|-------|--------|--------|--------|--------|--------------|
| P vs. A                     |       | 0      | 1,672  | 1      | 0      |              |
| OW vs. SW                   |       | -1,584 | 1,178  | 0,3248 | -1,344 |              |
| OR vs. SR*                  |       | -1,93  | 0,9999 | 0,1787 | -1,93  |              |
| SR vs. A                    |       | -1,674 | 1,423  | 0,3419 | -1,177 |              |
| SW vs. A                    |       | -0,779 | 1,511  | 0,6735 | -0,516 |              |
| OR vs. P                    |       | -3,604 | 1,359  | 0,0401 | -2,652 |              |
| OW vs. P                    |       | -2,363 | 1,382  | 0,2182 | -1,71  |              |
| OR vs. OW                   |       | -1,241 | 0,9574 | 0,3248 | -1,296 |              |
| SR vs. SW                   |       | -0,895 | 1,222  | 0,5798 | -0,733 |              |
| OR vs. non-OR               |       | -9,599 | 3,176  | 0,025  | -3,023 |              |
| <b>Ed. Qual.</b>            |       |        |        |        |        | <b>0,162</b> |
| random effects              |       |        |        |        |        |              |
| item                        | 2,980 | 1,726  |        | 0,000  | 40,203 |              |
| participant                 | 0,276 | 0,525  |        | 0,285  | 1,142  |              |
| <i>fixed effects</i>        |       |        |        |        |        |              |
| Ed.qual                     |       | 1,568  | 0,567  | 0,006  | 2,768  | 80%          |
| <b>Ed. Grad.</b>            |       |        |        |        |        | <b>0,039</b> |
| random effects              |       |        |        |        |        |              |
| item                        | 3,050 | 1,747  |        | 0,000  | 40,733 |              |
| participant                 | 0,835 | 0,914  |        | 0,016  | 5,752  |              |
| <i>fixed effects</i>        |       |        |        |        |        |              |
| Ed.grad                     |       | 0,939  | 0,613  | 0,126  | 1,531  | 39%          |
| <b>Age</b>                  |       |        |        |        |        | <b>0,103</b> |
| random effects              |       |        |        |        |        |              |
| item                        | 3,073 | 1,753  |        | 0,000  | 40,929 |              |
| participant                 | 0,650 | 0,806  |        | 0,042  | 4,141  |              |
| <i>fixed effects</i>        |       |        |        |        |        |              |
| Age                         |       | -0,063 | 0,029  | 0,029  | -2,181 | 70%          |
| <b>adjusted models</b>      |       |        |        |        |        |              |
| <b>Canonicity + Ed.qual</b> |       |        |        |        |        | <b>0,234</b> |

|                                               |       |        |       |       |        |              |
|-----------------------------------------------|-------|--------|-------|-------|--------|--------------|
| <i>random effects</i>                         |       |        |       |       |        |              |
| item                                          | 2,258 | 1,503  |       | 0,000 | 28,467 |              |
| participant                                   | 0,269 | 0,518  |       | 0,292 | 1,109  |              |
| <i>fixed effects</i>                          |       |        |       |       |        |              |
| Canonicity                                    |       |        | 1,432 | 0,775 | 0,065  | 1,847 43%    |
| Ed.qual                                       |       |        | 1,562 | 0,564 | 0,006  | 2,767        |
| <b>Canonicity without relatives + Ed.qual</b> |       |        |       |       |        | <b>0,140</b> |
| <i>random effects</i>                         |       |        |       |       |        |              |
| item                                          | 2,461 | 1,569  |       | 0,000 | 13,207 |              |
| participant                                   | 0,098 | 0,313  |       | 0,030 | 0,863  |              |
| <i>fixed effects</i>                          |       |        |       |       |        |              |
| Canonicity without relatives                  |       |        | 1,027 | 1,091 | 0,346  | 0,942 16%    |
| Ed.qual                                       |       |        | 1,150 | 0,718 | 0,109  | 1,602        |
| <b>Sentence type + Ed.qual</b>                |       |        |       |       |        | <b>0,376</b> |
| <i>random effects</i>                         |       |        |       |       |        |              |
| item                                          | 1,357 | 1,165  |       | 0,000 | 14,596 |              |
| participant                                   | 0,278 | 0,528  |       | 0,287 | 1,133  |              |
| <i>fixed effects</i>                          |       |        |       |       |        |              |
| Sentence type                                 |       |        |       |       | 0,018  | 13,671 92%   |
| OR vs. SR*                                    |       | -1,930 | 1,000 | 0,179 |        | -1,930       |
| OR vs. P*                                     |       | -3,604 | 1,359 | 0,040 |        | -2,652       |
| OR vs. OW*                                    |       | -1,241 | 0,957 | 0,325 |        | -1,296       |
| non-OR vs. OR*                                |       | -9,599 | 3,176 | 0,025 |        | -3,023       |
| Non-Relvs.Rel*                                |       | -1,919 | 0,826 | 0,020 |        | -3,250       |
| Ed.qual                                       |       | 1,566  | 0,566 | 0,006 |        | 2,769        |

| C NAVS-G SPPT in HP     |          |    |          |    |   |          |   |                |       |
|-------------------------|----------|----|----------|----|---|----------|---|----------------|-------|
|                         | Variance | SD | Estimate | SE | p | $\chi^2$ | z | R <sup>2</sup> | Power |
| Single predictor models |          |    |          |    |   |          |   |                |       |

|                                     |        |        |        |        |                |
|-------------------------------------|--------|--------|--------|--------|----------------|
| <b>Canonicity</b>                   |        |        |        |        | <b>0,119</b>   |
| <i>random effects</i>               |        |        |        |        |                |
| item                                | 3,506  | 1,872  | 0,000  | 31,679 |                |
| participant                         | 3,913  | 1,978  | 0,000  | 32,56  |                |
| <i>fixed effects</i>                |        |        |        |        |                |
| Canonicity                          | 1,8503 | 0,9296 | 0,0465 | 1,99   | 0,11891541 56% |
| <b>Canonicity without relatives</b> |        |        |        |        | <b>0,000</b>   |
| <i>random effects</i>               |        |        |        |        |                |
| item                                | 1,308  | 1,144  | 1,000  | 0,000  |                |
| participant                         | 0,000  | 0,000  | 0,437  | 0,604  |                |
| <i>fixed effects</i>                |        |        |        |        |                |
| Canonicity without relatives        | 0,003  | 0,826  | 0,997  | 0,003  | 0,000000 6%    |
| <b>Sentence type</b>                |        |        |        |        | <b>0,239</b>   |
| <i>random effects</i>               |        |        |        |        |                |
| item                                | 0,134  | 0,366  | 0,626  | 0,238  |                |
| participant                         | 3,743  | 1,935  | 0,000  | 31,250 |                |
| <i>fixed effects</i>                |        |        |        |        |                |
| Sentence type                       |        |        | 0,000  | 42,442 | 100%           |
| P vs. A                             | 0      | 1,672  | 1      | 0      |                |
| OW vs. SW                           | -1,584 | 1,178  | 0,3248 | -1,344 |                |
| OR vs. SR*                          | -1,93  | 0,9999 | 0,1787 | -1,93  |                |
| SR vs. A                            | -1,674 | 1,423  | 0,3419 | -1,177 |                |
| SW vs. A                            | -0,779 | 1,511  | 0,6735 | -0,516 |                |
| OR vs. P                            | -3,604 | 1,359  | 0,0401 | -2,652 |                |
| OW vs. P                            | -2,363 | 1,382  | 0,2182 | -1,71  |                |
| OR vs. OW                           | -1,241 | 0,9574 | 0,3248 | -1,296 |                |
| SR vs. SW                           | -0,895 | 1,222  | 0,5798 | -0,733 |                |
| OR vs.<br>non-OR                    | -9,599 | 3,176  | 0,025  | -3,023 |                |
| <b>Ed. Qual.</b>                    |        |        |        |        | <b>0,188</b>   |
| <i>random effects</i>               |        |        |        |        |                |
| item                                | 4,345  | 2,084  | 0,000  | 43,723 |                |

|                       |       |       |        |       |        |              |
|-----------------------|-------|-------|--------|-------|--------|--------------|
| participant           | 0,307 | 0,554 |        | 0,254 | 1,302  |              |
| <i>fixed effects</i>  |       |       |        |       |        |              |
| Ed.qual               |       |       | 1,441  | 0,266 | 0,000  | 5,427 100%   |
| <b>Ed. Grad.</b>      |       |       |        |       |        | <b>0,114</b> |
| <i>random effects</i> |       |       |        |       |        |              |
| item                  | 4,552 | 2,134 |        | 0,000 | 44,785 |              |
| participant           | 1,869 | 1,367 |        | 0,000 | 16,684 |              |
| <i>fixed effects</i>  |       |       |        |       |        |              |
| Ed.grad               |       |       | 1,488  | 0,468 | 0,001  | 3,181 89%    |
| <b>Age</b>            |       |       |        |       |        | <b>0,243</b> |
| <i>random effects</i> |       |       |        |       |        |              |
| item                  | 4,733 | 2,176 |        | 0,000 | 45,582 |              |
| participant           | 1,856 | 1,362 |        | 0,000 | 14,912 |              |
| <i>fixed effects</i>  |       |       |        |       |        |              |
| Age                   |       |       | -0,095 | 0,029 | 0,001  | -3,314 96%   |

**adjusted models**

|                                               |       |       |       |       |        |              |
|-----------------------------------------------|-------|-------|-------|-------|--------|--------------|
| <b>Canonicity + Ed.qual</b>                   |       |       |       |       |        | <b>0,28</b>  |
| <i>random effects</i>                         |       |       |       |       |        |              |
| item                                          | 3,219 | 1,794 |       | 0,000 | 30,430 |              |
| participant                                   | 0,300 | 0,547 |       | 0,264 | 1,254  |              |
| <i>fixed effects</i>                          |       |       |       |       |        |              |
| Canonicity                                    |       |       | 1,790 | 0,902 | 0,047  | 1,985 53%    |
| Ed.qual                                       |       |       | 1,437 | 0,265 | 0,000  | 5,429        |
| <b>Canonicity without relatives + Ed.qual</b> |       |       |       |       |        | <b>0,059</b> |
| <i>random effects</i>                         |       |       |       |       |        |              |
| item                                          | 0,707 | 0,841 |       | 1,000 | 0,000  |              |
| participant                                   | 0,000 | 0,000 |       | 0,684 | 0,165  |              |
| <i>fixed effects</i>                          |       |       |       |       |        |              |

|                                |       |       |         |       |       |        |        |       |      |
|--------------------------------|-------|-------|---------|-------|-------|--------|--------|-------|------|
| Canonicity without relatives   |       |       | -0,005  | 0,826 | 0,995 |        | -0,006 |       | 7%   |
| Ed.qual                        |       |       | 0,533   | 0,447 | 0,233 |        | 1,193  |       |      |
| <b>Sentence type + Ed.qual</b> |       |       |         |       |       |        |        | 0,507 |      |
| <i>random effects</i>          |       |       |         |       |       |        |        |       |      |
| item                           | 0,135 | 0,368 |         |       | 0,594 | 0,284  |        |       |      |
| participant                    | 0,275 | 0,524 |         |       | 0,308 | 1,041  |        |       |      |
| <i>fixed effects</i>           |       |       |         |       |       |        |        |       |      |
| Sentence type                  |       |       |         |       | 0,000 | 42,457 |        |       | 100% |
| OR vs. SR*                     |       |       | -2,665  | 0,677 | 0,000 |        | -3,935 |       |      |
| OR vs. P*                      |       |       | -4,113  | 1,106 | 0,000 |        | -3,720 |       |      |
| OR vs. OW*                     |       |       | -3,381  | 0,845 | 0,000 |        | -4,001 |       |      |
| non-OR vs. OR*                 |       |       | -13,485 | 2,215 | 0,000 |        | -6,087 |       |      |
| Non-Relvs.Rel*                 |       |       | -2,898  | 0,730 | 0,000 |        | -3,969 |       |      |
| Ed.qual                        |       |       | 1,426   | 0,263 | 0,000 |        | 5,417  |       |      |

**Supplementary Table 11: Complete NAVS-G SCT results**

| <b>NAVS-G SCT in patients with aphasia</b> |                 |           |                 |           |          |          |          |                       |              |
|--------------------------------------------|-----------------|-----------|-----------------|-----------|----------|----------|----------|-----------------------|--------------|
|                                            | <i>Variance</i> | <i>SD</i> | <i>Estimate</i> | <i>SE</i> | <i>p</i> | $\chi^2$ | <i>z</i> | <i>R</i> <sup>2</sup> | <i>Power</i> |
| <b>single predictor models</b>             |                 |           |                 |           |          |          |          |                       |              |
| <b>Canonicity</b>                          |                 |           |                 |           |          |          |          | 0,088                 |              |
| <i>random effects</i>                      |                 |           |                 |           |          |          |          |                       |              |
| item                                       | 0,424           | 0,651     |                 |           | 0,066    | 3,390    |          |                       |              |
| participant                                | 0,879           | 0,937     |                 |           | 0,002    | 9,282    |          |                       |              |
| <i>fixed effects</i>                       |                 |           |                 |           |          |          |          |                       |              |
| Canonicity                                 |                 |           | 1,329           | 0,466     | 0,004    |          | 2,851    |                       | 83%          |
| <b>Canonicity without relatives</b>        |                 |           |                 |           |          |          |          | 0,092                 |              |
| <i>random effects</i>                      |                 |           |                 |           |          |          |          |                       |              |

|                              |       |       |        |       |        |            |
|------------------------------|-------|-------|--------|-------|--------|------------|
| item                         | 0,000 | 0,000 |        | 0,999 | 0,000  |            |
| participant                  | 1,747 | 1,322 |        | 0,008 | 6,936  |            |
| <i>fixed effects</i>         |       |       |        |       |        |            |
| Canonicity without relatives |       |       | 1,424  | 0,599 | 0,018  | 2,376 69%  |
| <b>Sentence type*</b>        |       |       |        |       |        | 0,19       |
| <i>random effects</i>        |       |       |        |       |        |            |
| item                         | 0,126 | 0,355 |        | 0,499 | 0,457  |            |
| participant                  | 0,894 | 0,945 |        | 0,002 | 9,299  |            |
| <i>fixed effects</i>         |       |       |        |       |        |            |
| Sentence type                |       |       |        | 0,004 | 17,211 | 100%       |
| <b>NIHSS</b>                 |       |       |        |       |        | 0,058      |
| <i>random effects</i>        |       |       |        |       |        |            |
| item                         | 0,796 | 0,892 |        | 0,003 | 8,603  |            |
| participant                  | 0,500 | 0,707 |        | 0,050 | 3,827  |            |
| <i>fixed effects</i>         |       |       |        |       |        |            |
| NIHSS                        |       |       | -0,254 | 0,121 | 0,036  | -2,098 67% |
| <b>BI</b>                    |       |       |        |       |        | 0,047      |
| <i>random effects</i>        |       |       |        |       |        |            |
| item                         | 0,799 | 0,894 |        | 0,003 | 8,638  |            |
| participant                  | 0,519 | 0,720 |        | 0,050 | 3,842  |            |
| <i>fixed effects</i>         |       |       |        |       |        |            |
| BI                           |       |       | 0,044  | 0,022 | 0,042  | 2,032 58%  |
| <b>AAT.ss*</b>               |       |       |        |       |        | 0,096      |
| <i>random effects</i>        |       |       |        |       |        |            |
| item                         | 0,798 | 0,893 |        | 0,003 | 8,614  |            |
| participant                  | 0,283 | 0,532 |        | 0,240 | 1,379  |            |
| <i>fixed effects</i>         |       |       |        |       |        |            |
| AAT.ss                       |       |       | 0,161  | 0,053 | 0,003  | 3,005 91%  |
| <b>AAT.sy</b>                |       |       |        |       |        | 0,055      |



*random effects*

|             |       |       |  |       |       |  |
|-------------|-------|-------|--|-------|-------|--|
| item        | 0,793 | 0,891 |  | 0,003 | 8,570 |  |
| participant | 0,523 | 0,723 |  | 0,040 | 4,228 |  |

*fixed effects*

|               |  |  |       |       |       |       |              |
|---------------|--|--|-------|-------|-------|-------|--------------|
| AAT.sy        |  |  | 0,368 | 0,187 | 0,050 | 1,961 | 53%          |
| <b>Aph.se</b> |  |  |       |       |       |       | <b>0,108</b> |

*random effects*

|             |       |       |  |       |        |  |
|-------------|-------|-------|--|-------|--------|--|
| item        | 1,803 | 1,343 |  | 0,000 | 15,917 |  |
| participant | 0,599 | 0,774 |  | 0,073 | 3,213  |  |

*fixed effects*

|        |  |  |       |       |       |       |    |
|--------|--|--|-------|-------|-------|-------|----|
| Aph.se |  |  | 0,701 | 0,270 | 0,009 | 2,599 | 0% |
|--------|--|--|-------|-------|-------|-------|----|

**adjusted models**

|                            |  |  |  |  |  |  |              |
|----------------------------|--|--|--|--|--|--|--------------|
| <b>Canonicity + AAT.ss</b> |  |  |  |  |  |  | <b>0,185</b> |
|----------------------------|--|--|--|--|--|--|--------------|

*random effects*

|             |       |       |  |  |  |  |
|-------------|-------|-------|--|--|--|--|
| item        | 0,424 | 0,651 |  |  |  |  |
| participant | 0,281 | 0,530 |  |  |  |  |

*fixed effects*

|            |  |  |       |       |       |       |     |
|------------|--|--|-------|-------|-------|-------|-----|
| Canonicity |  |  | 1,332 | 0,467 | 0,004 | 2,853 | 85% |
| AAT.ss     |  |  | 0,161 | 0,053 | 0,003 | 3,015 |     |

|                                              |  |  |  |  |  |  |              |
|----------------------------------------------|--|--|--|--|--|--|--------------|
| <b>Canonicity without relatives + AAT.ss</b> |  |  |  |  |  |  | <b>0,286</b> |
|----------------------------------------------|--|--|--|--|--|--|--------------|

*random effects*

|             |       |       |  |       |       |  |
|-------------|-------|-------|--|-------|-------|--|
| item        | 0,000 | 0,000 |  | 1,000 | 0,000 |  |
| participant | 0,409 | 0,640 |  | 0,488 | 0,481 |  |

*fixed effects*

|            |  |  |       |       |       |       |     |
|------------|--|--|-------|-------|-------|-------|-----|
| Canonicity |  |  | 1,435 | 0,602 | 0,017 | 2,385 | 72% |
| AAT.ss     |  |  | 0,232 | 0,082 | 0,005 | 2,821 |     |

|                               |  |  |  |  |  |  |              |
|-------------------------------|--|--|--|--|--|--|--------------|
| <b>Sentence type + AAT.ss</b> |  |  |  |  |  |  | <b>0,287</b> |
|-------------------------------|--|--|--|--|--|--|--------------|

*random effects*

|                      |       |        |       |       |        |        |  |     |
|----------------------|-------|--------|-------|-------|--------|--------|--|-----|
| item                 | 0,125 | 0,353  |       |       |        |        |  |     |
| participant          | 0,280 | 0,529  |       |       |        |        |  |     |
| <i>fixed effects</i> |       |        |       |       |        |        |  |     |
| Sentence type*       |       |        |       | 0,004 | 17,574 |        |  | 97% |
| ORvs.non-OR          |       | -5,812 | 1,700 | 0,006 |        | -3,418 |  |     |
| Relvs.non-Rel        |       | -1,145 | 0,454 | 0,012 |        | -2,519 |  |     |
| AAT.ss               |       | 0,162  | 0,053 | 0,002 |        | 3,026  |  |     |

| <b>NAVS-G SCT in RHSP</b>           |                 |           |                 |           |          |          |          |                  |               |
|-------------------------------------|-----------------|-----------|-----------------|-----------|----------|----------|----------|------------------|---------------|
|                                     | <i>Variance</i> | <i>SD</i> | <i>Estimate</i> | <i>SE</i> | <i>p</i> | $\chi^2$ | <i>z</i> | <i>R-squared</i> | <i>Power*</i> |
| <b>single predictor models</b>      |                 |           |                 |           |          |          |          |                  |               |
| <b>Canonicity</b>                   |                 |           |                 |           |          |          |          | 0,004            |               |
| <i>random effects</i>               |                 |           |                 |           |          |          |          |                  |               |
| item                                | 0,000           | 0,000     |                 |           | 1,000    | 0,000    |          |                  |               |
| participant                         | 17,490          | 4,182     |                 |           | 0,001    | 11,054   |          |                  |               |
| <i>fixed effects</i>                |                 |           |                 |           |          |          |          |                  |               |
| Canonicity                          |                 |           | 0,576           | 0,774     | 0,457    |          | 0,744    |                  | 14%           |
| <b>Canonicity without relatives</b> |                 |           |                 |           |          |          |          | 0,000            |               |
| <i>random effects</i>               |                 |           |                 |           |          |          |          |                  |               |
| item                                | 0,361           | 0,601     |                 |           | 0,853    | 0,034    |          |                  |               |
| participant                         | 25,314          | 5,031     |                 |           | 0,012    | 6,369    |          |                  |               |
| <i>fixed effects</i>                |                 |           |                 |           |          |          |          |                  |               |
| Canonicity without relatives        |                 |           | 0,005           | 1,136     | 0,996    |          | 0,004    |                  | 6%            |
| <b>Sentence type</b>                |                 |           |                 |           |          |          |          | 0,011            |               |
| <i>random effects</i>               |                 |           |                 |           |          |          |          |                  |               |
| item                                | 0,000           | 0,000     |                 |           | 1,000    | 0,000    |          |                  |               |
| participant                         | 18,540          | 4,306     |                 |           | 0,001    | 11,286   |          |                  |               |
| <i>fixed effects</i>                |                 |           |                 |           |          |          |          |                  |               |
| Sentence type                       |                 |           |                 |           | 0,6982   | 0,1503   |          |                  | 18%           |

| c. Healthy participants             |          |       |          |       |        |          |       |           |        |
|-------------------------------------|----------|-------|----------|-------|--------|----------|-------|-----------|--------|
|                                     | Variance | SD    | Estimate | SE    | p      | $\chi^2$ | z     | R-squared | Power* |
| <b>single predictor models</b>      |          |       |          |       |        |          |       |           |        |
| <b>Canonicity</b>                   |          |       |          |       |        |          |       | 0,002     |        |
| <i>random effects</i>               |          |       |          |       |        |          |       |           |        |
| item                                | 0,233    | 0,483 |          |       | 0,864  | 0,029    |       |           |        |
| participant                         | 8,539    | 2,922 |          |       | 0,002  | 9,817    |       |           |        |
| <i>fixed effects</i>                |          |       |          |       |        |          |       |           |        |
| Canonicity                          |          |       | 0,318    | 0,823 | 0,699  |          | 0,386 |           | 8%     |
| <b>Canonicity without relatives</b> |          |       |          |       |        |          |       | 0,000     |        |
| <i>random effects</i>               |          |       |          |       |        |          |       |           |        |
| item                                | 7,335    | 2,708 |          |       | 0,683  | 0,167    |       |           |        |
| participant                         | 0,904    | 0,951 |          |       | 0,092  | 2,843    |       |           |        |
| <i>fixed effects</i>                |          |       |          |       |        |          |       |           |        |
| Canonicity without relatives        |          |       | 0,000    | 1,148 | 1,000  |          | 0,000 |           | 12%    |
| <b>Sentence type</b>                |          |       |          |       |        |          |       | 0,007     |        |
| <i>random effects</i>               |          |       |          |       |        |          |       |           |        |
| item                                | 0,141    | 0,376 |          |       | 0,918  | 0,011    |       |           |        |
| participant                         | 9,114    | 3,019 |          |       | 0,002  | 9,846    |       |           |        |
| <i>fixed effects</i>                |          |       |          |       |        |          |       |           |        |
| Sentence type                       |          |       |          |       | 0,9819 | 0,7189   |       |           | 8%     |

Supplementary Table 12: Complete NAT-G results

| NAT-G LHSP                     |          |    |          |    |   |          |   |                |       |
|--------------------------------|----------|----|----------|----|---|----------|---|----------------|-------|
|                                | Variance | SD | Estimate | SE | p | $\chi^2$ | z | R <sup>2</sup> | Power |
| <i>single predictor models</i> |          |    |          |    |   |          |   |                |       |
| <b>Canonicity</b>              |          |    |          |    |   |          |   | 0,066          |       |

|                                     |        |        |       |       |         |              |
|-------------------------------------|--------|--------|-------|-------|---------|--------------|
| <i>random effects</i>               |        |        |       |       |         |              |
| item                                | 1,534  | 1,238  |       | 0,001 | 10,678  |              |
| participant                         | 12,847 | 3,584  |       | 0,000 | 186,760 |              |
| <i>fixed effects</i>                |        |        |       |       |         |              |
| Canonicity                          |        | 2,228  | 0,652 | 0,001 | 3,416   | 96%          |
| <b>Canonicity without relatives</b> |        |        |       |       |         | <b>0,078</b> |
| <i>random effects</i>               |        |        |       |       |         |              |
| item                                | 0,000  | 0,000  |       | 1,000 | 0,000   |              |
| participant                         | 21,440 | 4,630  |       | 0,000 | 90,186  |              |
| <i>fixed effects</i>                |        |        |       |       |         |              |
| Canonicity without relatives        |        | 2,883  | 0,652 | 0,000 | 4,425   | 91%          |
| <b>Sentence type</b>                |        |        |       |       |         | <b>0,194</b> |
| <i>random effects</i>               |        |        |       |       |         |              |
| item                                | 0,000  | 0,000  |       | 1,000 | 0,000   |              |
| participant                         | 14,650 | 3,827  |       | 0,000 | 202,910 |              |
| <i>fixed effects</i>                |        |        |       |       |         |              |
| Sentence type                       |        |        |       | 0,000 | 39,635  | 99%          |
| <b>NIHSS</b>                        |        |        |       |       |         | <b>0,235</b> |
| <i>random effects</i>               |        |        |       |       |         |              |
| item                                | 2,480  | 1,575  |       | 0,000 | 21,597  |              |
| participant                         | 9,558  | 3,092  |       | 0,000 | 143,150 |              |
| <i>fixed effects</i>                |        |        |       |       |         |              |
| NIHSS                               |        | -1,042 | 0,468 | 0,026 | -2,227  | 77%          |
| <b>AAT.sy*</b>                      |        |        |       |       |         | <b>0,306</b> |
| <i>random effects</i>               |        |        |       |       |         |              |
| item                                | 2,451  | 1,566  |       | 0,000 | 21,470  |              |
| participant                         | 6,171  | 2,484  |       | 0,000 | 89,345  |              |
| <i>fixed effects</i>                |        |        |       |       |         |              |
| AAT.sy                              |        | 1,630  | 0,551 | 0,003 | 2,958   | 89%          |
| <b>Aph.se</b>                       |        |        |       |       |         | <b>0,287</b> |
| <i>random effects</i>               |        |        |       |       |         |              |
| item                                | 2,462  | 1,569  |       | 0,000 | 21,443  |              |

|                                              |       |       |       |       |        |              |
|----------------------------------------------|-------|-------|-------|-------|--------|--------------|
| participant                                  | 5,531 | 2,352 |       | 0,000 | 90,100 |              |
| <i>fixed effects</i>                         |       |       |       |       |        |              |
| Aph.se                                       |       | 1,805 | 0,654 | 0,006 | 2,761  | 0%           |
| <b>Token Test</b>                            |       |       |       |       |        | <b>0,259</b> |
| <i>random effects</i>                        |       |       |       |       |        |              |
| item                                         | 2,473 | 1,573 |       | 0,000 | 21,418 |              |
| participant                                  | 5,333 | 2,309 |       | 0,000 | 89,142 |              |
| <i>fixed effects</i>                         |       |       |       |       |        |              |
| Token Test                                   |       | 0,319 | 0,126 | 0,011 | 2,530  | 0%           |
| <b>AAT.ss*</b>                               |       |       |       |       |        | <b>0,41</b>  |
| <i>random effects</i>                        |       |       |       |       |        |              |
| item                                         | 2,496 | 1,580 |       | 0,000 | 21,831 |              |
| participant                                  | 3,889 | 1,972 |       | 0,000 | 58,158 |              |
| <i>fixed effects</i>                         |       |       |       |       |        |              |
| AAT.ss*                                      |       | 0,613 | 0,157 | 0,000 | 3,916  | 99%          |
| <b>adjusted models</b>                       |       |       |       |       |        |              |
| <b>Canonicity + AAT.ss</b>                   |       |       |       |       |        | <b>0,484</b> |
| <i>random effects</i>                        |       |       |       |       |        |              |
| item                                         | 1,599 | 1,264 |       | 0,001 | 11,146 |              |
| participant                                  | 4,077 | 2,019 |       | 0,000 | 59,749 |              |
| <i>fixed effects</i>                         |       |       |       |       |        |              |
| Canonicity                                   |       | 2,273 | 0,663 | 0,001 | 3,426  | 99%          |
| AAT.ss                                       |       | 0,630 | 0,161 | 0,000 | 3,921  |              |
| <b>Canonicity without relatives + AAT.ss</b> |       |       |       |       |        | <b>0,567</b> |
| <i>random effects</i>                        |       |       |       |       |        |              |
| item                                         | 0,000 | 0,000 |       | 1,000 | 0,000  |              |
| participant                                  | 3,662 | 1,914 |       | 0,000 | 26,416 |              |
| <i>fixed effects</i>                         |       |       |       |       |        |              |
| Canonicity without relatives                 |       | 2,861 | 0,637 | 0,000 | 4,489  | 100%         |
| AAT.ss                                       |       | 0,627 | 0,182 | 0,001 | 3,444  |              |
| <b>Sentence type + AAT.ss</b>                |       |       |       |       |        | <b>0,615</b> |

|                       |       |         |       |       |       |        |      |
|-----------------------|-------|---------|-------|-------|-------|--------|------|
| <i>random effects</i> |       |         |       |       |       |        |      |
| item                  | 0,000 | 0,000   |       |       | 1,000 | 0,000  |      |
| participant           | 4,654 | 2,157   |       |       | 0,000 | 65,341 |      |
| <i>fixed effects</i>  |       |         |       |       |       |        |      |
| Sentence type         |       |         |       |       | 0,000 | 40,124 | 100% |
| Pvs.A                 |       | -4,137  | 1,035 | 0,000 |       | -3,996 |      |
| OWvs.SW               |       | -2,258  | 0,780 | 0,005 |       | -2,895 |      |
| SRvs.A                |       | -5,067  | 1,073 | 0,000 |       | -4,722 |      |
| ORvs.P                |       | -2,169  | 0,730 | 0,005 |       | -2,972 |      |
| ORvs.OW               |       | -2,403  | 0,743 | 0,002 |       | -3,236 |      |
| SRvs.SW               |       | -3,421  | 0,832 | 0,000 |       | -4,113 |      |
| ORvs.non-OR           |       | -10,472 | 2,435 | 0,000 |       | -4,301 |      |
| Rel vs. Non-Rel       |       | -3,104  | 0,712 | 0,000 |       | -4,261 |      |
| AAT.ss                |       | 0,679   | 0,171 | 0,000 |       | 3,963  |      |

|                                 |                 |           |                 |           |          |                      |          |                      |              |
|---------------------------------|-----------------|-----------|-----------------|-----------|----------|----------------------|----------|----------------------|--------------|
| <b>between group analyses</b>   |                 |           |                 |           |          |                      |          |                      |              |
|                                 | <i>Variance</i> | <i>SD</i> | <i>Estimate</i> | <i>SE</i> | <i>p</i> | <i>χ<sup>2</sup></i> | <i>z</i> | <i>R<sup>2</sup></i> | <i>Power</i> |
| <b>single predictor models</b>  |                 |           |                 |           |          |                      |          |                      |              |
| Group                           |                 |           |                 |           |          |                      |          | 0,196                |              |
| <i>random effects</i>           |                 |           |                 |           |          |                      |          |                      |              |
| item                            | 5,429           | 2,330     |                 |           | 0,000    | 22,629               |          |                      |              |
| participant                     | 1,239           | 1,113     |                 |           | 0,000    | 179,400              |          |                      |              |
| <i>fixed effects</i>            |                 |           |                 |           |          |                      |          |                      |              |
| Group                           |                 |           |                 |           | 0,001    | 13,309               |          |                      | 88,00%       |
| HSvs.RH                         |                 |           | -1,431          | 1,024     | 0,162    |                      | 1,398    |                      |              |
| HSvs.LH                         |                 |           | -3,787          | 0,981     | 0,000    |                      | 3,861    |                      |              |
| RHvs.LH                         |                 |           | -2,355          | 1,041     | 0,036    |                      | 2,262    |                      |              |
| <b>models with interactions</b> |                 |           |                 |           |          |                      |          |                      |              |
| Group*Canonicity                |                 |           |                 |           |          |                      |          | 0,199                |              |
| <i>random effects</i>           |                 |           |                 |           |          |                      |          |                      |              |
| item                            | 0,795           | 0,892     |                 |           | 0,001    | 11,919               |          |                      |              |

|                                           |       |       |  |       |         |              |        |
|-------------------------------------------|-------|-------|--|-------|---------|--------------|--------|
| participant                               | 5,831 | 2,415 |  | 0,000 | 184,010 |              |        |
| <i>fixed effects</i>                      |       |       |  |       |         |              |        |
| Group                                     |       |       |  | 0,002 | 12,902  |              |        |
| Canonicity                                |       |       |  | 0,001 | 10,756  |              |        |
| Group*Canonicity                          |       |       |  | 0,150 | 3,792   |              |        |
| <b>Group*Canonicity without relatives</b> |       |       |  |       |         | <b>0,120</b> |        |
| <i>random effects</i>                     |       |       |  |       |         |              |        |
| item                                      | 0,000 | 0,000 |  | 1,000 | 0,000   |              |        |
| participant                               | 7,140 | 2,672 |  | 0,000 | 82,725  |              |        |
| <i>fixed effects</i>                      |       |       |  |       |         |              |        |
| Group                                     |       |       |  | 0,067 | 5,396   |              |        |
| Canonicity without relatives              |       |       |  | 0,001 | 11,093  |              |        |
| Group*Canonicity without relatives        |       |       |  | 0,018 | 8,031   |              |        |
| <i>Canonical</i>                          |       |       |  |       |         |              |        |
| Group                                     |       |       |  | 0,346 | 2,122   | 0,065        | 3,00%  |
| HSvs.RH                                   | 0,719 | 1,573 |  | 0,648 | 0,457   |              |        |
| HSvs.LH                                   | 2,767 | 1,632 |  | 0,270 | 1,696   |              |        |
| RHvs.LH                                   | 2,048 | 1,722 |  | 0,351 | 1,190   |              |        |
| <i>Non-Canonical</i>                      |       |       |  |       |         |              |        |
| Group                                     |       |       |  | 0,002 | 12,692  | 0,249        | 77,00% |
| HSvs.RH                                   | 1,925 | 1,287 |  | 0,135 | 1,496   |              |        |
| HSvs.LH                                   | 4,834 | 1,281 |  | 0,000 | 3,774   |              |        |
| RHvs.LH                                   | 2,908 | 1,293 |  | 0,037 | 2,250   |              |        |
| <b>Group*Sentence type</b>                |       |       |  |       |         | <b>0,204</b> |        |
| <i>random effects</i>                     |       |       |  |       |         |              |        |
| item                                      | 7,216 | 2,686 |  | 0,835 | 0,044   |              |        |
| participant                               | 0,027 | 0,165 |  | 0,000 | 198,330 |              |        |
| <i>fixed effects</i>                      |       |       |  |       |         |              |        |
| Group                                     |       |       |  | 0,010 | 9,237   |              |        |
| Sentence type                             |       |       |  | 0,000 | 30,745  |              |        |
| Group*Sentence type                       |       |       |  | 0,059 | 17,763  |              |        |
| <i>Active</i>                             |       |       |  |       |         |              |        |
| Group                                     |       |       |  | 0,548 | 1,205   | 0,081        | 13%    |

|                             |  |  |  |       |       |  |  |       |     |
|-----------------------------|--|--|--|-------|-------|--|--|-------|-----|
| <i>Passive</i>              |  |  |  |       |       |  |  |       |     |
| Group                       |  |  |  | 0,642 | 0,887 |  |  | 0,014 | 0%  |
| <i>Subject Wh-Questions</i> |  |  |  |       |       |  |  |       |     |
| Group                       |  |  |  | 0,736 | 0,613 |  |  | 0,014 | 0%  |
| <i>Object Wh-Questions</i>  |  |  |  |       |       |  |  |       |     |
| Group                       |  |  |  | 0,214 | 3,085 |  |  | 0,134 | 7%  |
| <i>Subject Relative</i>     |  |  |  |       |       |  |  |       |     |
| Group                       |  |  |  | 0,680 | 0,772 |  |  | 0,009 | 1%  |
| <i>Object Relative</i>      |  |  |  |       |       |  |  |       |     |
| Group                       |  |  |  | 0,120 | 4,242 |  |  | 0,189 | 13% |

**NAT-G RHSP**

|                                     | <i>Variance</i> | <i>SD</i> | <i>Estimate</i> | <i>SE</i> | <i>p</i> | <i>χ<sup>2</sup></i> | <i>z</i> | <i>R<sup>2</sup></i> | <i>Power</i> |
|-------------------------------------|-----------------|-----------|-----------------|-----------|----------|----------------------|----------|----------------------|--------------|
| <b>single predictor models</b>      |                 |           |                 |           |          |                      |          |                      |              |
| <b>Canonicity</b>                   |                 |           |                 |           |          |                      |          | <b>0,046</b>         |              |
| <i>random effects</i>               |                 |           |                 |           |          |                      |          |                      |              |
| item                                | 2,053           | 1,433     |                 |           | 0,037    | 4,354                |          |                      |              |
| participant                         | 1,946           | 1,395     |                 |           | 0,018    | 5,633                |          |                      |              |
| <i>fixed effects</i>                |                 |           |                 |           |          |                      |          |                      |              |
| Canonicity                          |                 |           | 1,185           | 0,944     | 0,210    |                      | 1,254    |                      | 17%          |
| <b>Canonicity without relatives</b> |                 |           |                 |           |          |                      |          | <b>0,000</b>         |              |
| <i>random effects</i>               |                 |           |                 |           |          |                      |          |                      |              |
| item                                | 0,000           | 0,000     |                 |           | 1,000    | 0,000                |          |                      |              |
| participant                         | 0,000           | 0,000     |                 |           | 1,000    | 0,000                |          |                      |              |
| <i>fixed effects</i>                |                 |           |                 |           |          |                      |          |                      |              |
| Canonicity without relatives        |                 |           | 0,000           | 1,007     | 1,000    |                      | 0,000    |                      | 5%           |
| <b>Sentence type</b>                |                 |           |                 |           |          |                      |          | <b>0,106</b>         |              |
| <i>random effects</i>               |                 |           |                 |           |          |                      |          |                      |              |



|                      |       |       |       |       |     |
|----------------------|-------|-------|-------|-------|-----|
| item                 | 0,775 | 0,880 | 0,321 | 0,984 |     |
| participant          | 2,005 | 1,416 | 0,020 | 5,394 |     |
| <i>fixed effects</i> |       |       |       |       |     |
| Sentence type        |       |       | 0,262 | 6,483 | 48% |

---
